# Supplementary material for: Global disease burden of non-Hodgkin lymphoma in adolescents and young adults aged 15 to 39 from 1990 to 2021
Source: Research Square preprint supplement (doi:10.21203/rs.3.rs-5831900/v1), 2025-01-17
Supplement: Supplementary file 1 [file e4c1ab491efd62f0e4e23bd4.docx]

**Supplementary Table 1.The incidence, mortality, and DALYs of NHL in AYAs aged 15-39 across 204 countries from 1990 to 2021.**

| **Location** | **Incident cases in 1990** | **Incidence rate in 1990** | **Incident casea in 2021** | **Incidence rate in 2021** | **Cases change** | **EAPC** |
| --- | --- | --- | --- | --- | --- | --- |
| Afghanistan | 33 (18 to 64) | 1.06 (0.56 to 2.04) | 171 (103 to 303) | 1.4 (0.84 to 2.48) | 4.11 (2.6 to 7.12) | 1.04 (0.89 to 1.18) |
| Albania | 9 (7 to 10) | 0.6 (0.48 to 0.74) | 10 (6 to 13) | 1.02 (0.68 to 1.38) | 0.13 (-0.22 to 0.66) | 1.85 (1.17 to 2.54) |
| Algeria | 119 (90 to 176) | 1.18 (0.89 to 1.74) | 373 (267 to 539) | 2.19 (1.57 to 3.17) | 2.14 (1.14 to 3.41) | 1.89 (1.76 to 2.02) |
| American Samoa | 0 (0 to 1) | 1.83 (1.35 to 2.59) | 1 (0 to 1) | 3.9 (2.62 to 5.35) | 0.84 (0.11 to 1.89) | 2.7 (2.51 to 2.88) |
| Andorra | 3 (2 to 4) | 10.54 (7.14 to 15.08) | 3 (2 to 4) | 12.15 (7.82 to 17.11) | 0.17 (-0.29 to 1.02) | 0.62 (0.09 to 1.15) |
| Angola | 32 (21 to 45) | 0.81 (0.54 to 1.14) | 129 (81 to 193) | 1.06 (0.67 to 1.58) | 3.09 (1.64 to 5.35) | 1.22 (0.98 to 1.46) |
| Antigua and Barbuda | 1 (1 to 1) | 2.85 (2.48 to 3.33) | 1 (1 to 1) | 2.34 (1.95 to 2.86) | 0.1 (-0.12 to 0.37) | 0.32 (-0.03 to 0.68) |
| Argentina | 344 (297 to 388) | 2.82 (2.43 to 3.18) | 508 (416 to 608) | 2.9 (2.37 to 3.47) | 0.47 (0.19 to 0.86) | 0.32 (0.1 to 0.53) |
| Armenia | 15 (12 to 17) | 1.02 (0.85 to 1.21) | 18 (14 to 23) | 1.66 (1.29 to 2.11) | 0.23 (-0.14 to 0.68) | 1.76 (1.06 to 2.46) |
| Australia | 266 (236 to 302) | 3.92 (3.48 to 4.46) | 429 (334 to 549) | 4.95 (3.85 to 6.33) | 0.61 (0.21 to 1.15) | 0.29 (-0.14 to 0.72) |
| Austria | 128 (103 to 155) | 4.27 (3.44 to 5.16) | 167 (131 to 208) | 5.91 (4.65 to 7.36) | 0.3 (-0.05 to 0.75) | 0.63 (0.2 to 1.07) |
| Azerbaijan | 28 (18 to 41) | 0.88 (0.58 to 1.3) | 44 (27 to 70) | 1.03 (0.63 to 1.65) | 0.57 (-0.13 to 2.21) | -0.44 (-1.11 to 0.24) |
| Bahamas | 4 (4 to 5) | 3.52 (3.1 to 4.01) | 7 (6 to 9) | 4.72 (3.59 to 6.09) | 0.76 (0.31 to 1.35) | 0.88 (0.77 to 0.98) |
| Bahrain | 5 (4 to 6) | 1.84 (1.39 to 2.32) | 24 (18 to 33) | 3.45 (2.5 to 4.68) | 4.14 (2.42 to 6.69) | 1.87 (1.59 to 2.16) |
| Bangladesh | 325 (244 to 413) | 0.77 (0.58 to 0.98) | 650 (418 to 1080) | 0.94 (0.61 to 1.57) | 1 (0.22 to 2.07) | 0.52 (0.28 to 0.77) |
| Barbados | 6 (5 to 7) | 5.33 (4.7 to 6.17) | 6 (4 to 8) | 5.91 (4.41 to 8.03) | 0 (-0.28 to 0.39) | -0.04 (-0.3 to 0.22) |
| Belarus | 42 (34 to 52) | 1.06 (0.87 to 1.31) | 130 (94 to 174) | 4.44 (3.2 to 5.94) | 2.1 (1.15 to 3.49) | 4.64 (4.37 to 4.92) |
| Belgium | 176 (142 to 222) | 4.74 (3.81 to 5.95) | 224 (176 to 284) | 6.4 (5.02 to 8.1) | 0.27 (-0.06 to 0.72) | 0.38 (0.01 to 0.74) |
| Belize | 1 (1 to 1) | 0.98 (0.88 to 1.1) | 3 (2 to 3) | 1.49 (1.25 to 1.74) | 2.93 (2.17 to 3.79) | 1.53 (1.22 to 1.83) |
| Benin | 9 (7 to 12) | 0.55 (0.41 to 0.73) | 46 (31 to 66) | 0.88 (0.58 to 1.25) | 3.93 (2.13 to 6.21) | 1.37 (1.25 to 1.5) |
| Bermuda | 2 (1 to 2) | 6.3 (5.13 to 7.7) | 1 (1 to 2) | 7.15 (5.41 to 9.46) | -0.23 (-0.46 to 0.08) | 0.6 (0.41 to 0.79) |
| Bhutan | 2 (1 to 3) | 0.8 (0.52 to 1.18) | 4 (2 to 6) | 1.04 (0.63 to 1.75) | 0.66 (-0.13 to 2) | 0.54 (0.45 to 0.63) |
| Bolivia (Plurinational State of) | 58 (42 to 77) | 2.35 (1.72 to 3.12) | 181 (120 to 271) | 3.68 (2.45 to 5.51) | 2.12 (0.9 to 3.98) | 1.22 (1.04 to 1.39) |
| Bosnia and Herzegovina | 20 (16 to 24) | 1.04 (0.87 to 1.26) | 20 (13 to 28) | 2.03 (1.33 to 2.81) | 0.04 (-0.32 to 0.5) | 2.68 (2.29 to 3.07) |
| Botswana | 7 (4 to 10) | 1.36 (0.86 to 2.04) | 21 (14 to 32) | 1.99 (1.29 to 3.03) | 2.02 (0.85 to 3.96) | 1.33 (1.03 to 1.62) |
| Brazil | 955 (905 to 1007) | 1.52 (1.44 to 1.6) | 1974 (1845 to 2124) | 2.32 (2.16 to 2.49) | 1.07 (0.89 to 1.26) | 1.01 (0.85 to 1.17) |
| Brunei Darussalam | 3 (2 to 3) | 2.16 (1.7 to 2.74) | 5 (4 to 6) | 2.47 (1.95 to 3.1) | 0.89 (0.39 to 1.59) | 0.47 (0.18 to 0.76) |
| Bulgaria | 47 (41 to 53) | 1.57 (1.37 to 1.77) | 62 (48 to 80) | 3.25 (2.54 to 4.19) | 0.32 (-0.03 to 0.76) | 2.84 (2.57 to 3.11) |
| Burkina Faso | 18 (13 to 25) | 0.57 (0.4 to 0.78) | 79 (54 to 109) | 0.91 (0.62 to 1.26) | 3.36 (1.91 to 5.42) | 1.73 (1.61 to 1.86) |
| Burundi | 42 (28 to 62) | 2.05 (1.33 to 3.01) | 92 (63 to 131) | 1.74 (1.2 to 2.48) | 1.16 (0.44 to 2.44) | -0.95 (-1.25 to -0.65) |
| Cabo Verde | 1 (0 to 1) | 0.39 (0.29 to 0.65) | 5 (2 to 7) | 1.96 (0.94 to 2.91) | 8.59 (1.99 to 14.83) | 4.63 (3.5 to 5.77) |
| Cambodia | 37 (27 to 53) | 0.97 (0.7 to 1.39) | 110 (75 to 163) | 1.51 (1.04 to 2.25) | 1.93 (0.83 to 3.66) | 1.21 (1.08 to 1.34) |
| Cameroon | 31 (23 to 40) | 0.81 (0.62 to 1.05) | 186 (121 to 258) | 1.45 (0.94 to 2) | 5.03 (2.81 to 8.17) | 1.8 (1.72 to 1.88) |
| Canada | 1249 (970 to 1576) | 11.23 (8.73 to 14.17) | 967 (742 to 1240) | 8.15 (6.25 to 10.45) | -0.23 (-0.45 to 0.14) | -2.11 (-2.62 to -1.6) |
| Central African Republic | 11 (8 to 15) | 1.01 (0.73 to 1.4) | 25 (16 to 35) | 1.14 (0.75 to 1.59) | 1.36 (0.59 to 2.35) | 0.29 (0.21 to 0.38) |
| Chad | 9 (6 to 12) | 0.42 (0.29 to 0.58) | 44 (29 to 64) | 0.7 (0.46 to 1.01) | 4.03 (2.37 to 6.47) | 1.82 (1.61 to 2.03) |
| Chile | 96 (85 to 108) | 1.68 (1.49 to 1.89) | 180 (151 to 214) | 2.54 (2.14 to 3.03) | 0.87 (0.5 to 1.33) | 1.34 (1.1 to 1.59) |
| China | 5686 (4787 to 6718) | 1.04 (0.87 to 1.23) | 9926 (7789 to 11886) | 2.15 (1.69 to 2.58) | 0.75 (0.35 to 1.25) | 2.31 (1.92 to 2.71) |
| Colombia | 282 (251 to 321) | 2.01 (1.79 to 2.29) | 637 (516 to 797) | 3.17 (2.57 to 3.97) | 1.26 (0.74 to 1.92) | 1.57 (1.38 to 1.76) |
| Comoros | 3 (1 to 4) | 1.62 (0.63 to 2.44) | 7 (5 to 10) | 2.25 (1.46 to 3.21) | 1.48 (0.4 to 6.01) | 0.31 (-0.33 to 0.97) |
| Congo | 11 (8 to 16) | 1.14 (0.81 to 1.66) | 35 (24 to 52) | 1.59 (1.07 to 2.35) | 2.26 (1.15 to 4.13) | 1.01 (0.76 to 1.26) |
| Cook Islands | 0 (0 to 0) | 1.3 (0.9 to 1.82) | 0 (0 to 0) | 3.4 (2.18 to 4.93) | 1 (0.16 to 2.3) | 3.67 (3.41 to 3.92) |
| Costa Rica | 35 (29 to 41) | 2.72 (2.25 to 3.23) | 103 (83 to 126) | 5.42 (4.35 to 6.62) | 1.95 (1.24 to 3.03) | 1.95 (1.68 to 2.23) |
| C么te d'Ivoire | 46 (34 to 61) | 0.96 (0.72 to 1.29) | 173 (121 to 239) | 1.54 (1.08 to 2.13) | 2.78 (1.55 to 4.6) | 1.55 (1.44 to 1.66) |
| Croatia | 44 (36 to 55) | 2.43 (2 to 3.02) | 50 (38 to 65) | 4 (3.02 to 5.24) | 0.13 (-0.18 to 0.52) | 1.9 (1.42 to 2.38) |
| Cuba | 197 (169 to 226) | 4.04 (3.47 to 4.64) | 145 (116 to 181) | 4.04 (3.24 to 5.04) | -0.26 (-0.43 to -0.04) | -0.46 (-0.84 to -0.08) |
| Cyprus | 11 (8 to 15) | 3.61 (2.76 to 4.81) | 38 (27 to 52) | 7.5 (5.34 to 10.32) | 2.39 (1.22 to 4.03) | 2.46 (1.7 to 3.23) |
| Czechia | 95 (79 to 114) | 2.55 (2.14 to 3.08) | 163 (122 to 216) | 5.5 (4.13 to 7.32) | 0.72 (0.19 to 1.46) | 3.17 (2.89 to 3.46) |
| Democratic People's Republic of Korea | 83 (55 to 120) | 1 (0.66 to 1.44) | 143 (97 to 217) | 1.42 (0.96 to 2.16) | 0.72 (0.08 to 1.65) | 1.02 (0.95 to 1.1) |
| Democratic Republic of the Congo | 102 (69 to 144) | 0.72 (0.48 to 1.01) | 334 (233 to 484) | 0.93 (0.64 to 1.34) | 2.26 (1.27 to 3.7) | 0.82 (0.54 to 1.11) |
| Denmark | 45 (38 to 53) | 2.36 (1.98 to 2.8) | 65 (52 to 82) | 3.59 (2.85 to 4.47) | 0.45 (0.09 to 0.89) | 1.38 (0.99 to 1.77) |
| Djibouti | 2 (1 to 3) | 1.16 (0.74 to 1.69) | 10 (6 to 15) | 1.85 (1.09 to 2.84) | 3.91 (2 to 7.09) | 1.45 (1.19 to 1.7) |
| Dominica | 1 (1 to 1) | 2.95 (2.38 to 3.52) | 1 (1 to 2) | 4.24 (3.05 to 5.8) | 0.27 (-0.12 to 0.77) | 1.36 (1.14 to 1.57) |
| Dominican Republic | 33 (27 to 40) | 1.07 (0.88 to 1.3) | 81 (56 to 107) | 1.77 (1.23 to 2.35) | 1.45 (0.75 to 2.32) | 2.34 (2.06 to 2.61) |
| Ecuador | 95 (82 to 113) | 2.3 (1.98 to 2.75) | 449 (333 to 607) | 6.15 (4.56 to 8.31) | 3.73 (2.3 to 5.73) | 3.26 (2.71 to 3.82) |
| Egypt | 213 (175 to 265) | 0.97 (0.8 to 1.21) | 484 (345 to 831) | 1.15 (0.82 to 1.97) | 1.27 (0.55 to 2.48) | 0.19 (-0.06 to 0.43) |
| El Salvador | 19 (17 to 23) | 0.93 (0.8 to 1.12) | 55 (40 to 72) | 2.14 (1.55 to 2.79) | 1.87 (1.02 to 2.88) | 3.03 (2.7 to 3.36) |
| Equatorial Guinea | 1 (1 to 2) | 0.9 (0.6 to 1.32) | 11 (7 to 19) | 1.63 (0.94 to 2.7) | 7.32 (3.61 to 13.86) | 2.16 (1.81 to 2.51) |
| Eritrea | 21 (15 to 27) | 1.61 (1.14 to 2.12) | 57 (37 to 84) | 2.05 (1.3 to 3) | 1.76 (0.72 to 3.13) | 0.67 (0.55 to 0.79) |
| Estonia | 16 (13 to 21) | 2.89 (2.29 to 3.67) | 38 (29 to 49) | 9.61 (7.32 to 12.46) | 1.32 (0.63 to 2.3) | 3.47 (2.94 to 4.02) |
| Eswatini | 4 (3 to 6) | 1.48 (1.03 to 2.06) | 19 (10 to 28) | 3.64 (2.04 to 5.47) | 3.16 (1.45 to 5.78) | 3.22 (2.62 to 3.82) |
| Ethiopia | 330 (218 to 466) | 1.81 (1.19 to 2.55) | 733 (516 to 999) | 1.58 (1.11 to 2.16) | 1.22 (0.59 to 2.64) | -0.82 (-1.08 to -0.56) |
| Fiji | 4 (3 to 6) | 1.34 (1.01 to 1.82) | 8 (6 to 11) | 2.25 (1.56 to 3.15) | 0.85 (0.15 to 1.88) | 2.09 (1.83 to 2.35) |
| Finland | 82 (70 to 97) | 4.53 (3.87 to 5.34) | 112 (87 to 140) | 6.7 (5.24 to 8.41) | 0.36 (0.02 to 0.83) | 1.51 (1.32 to 1.7) |
| France | 1115 (878 to 1382) | 5.07 (3.99 to 6.28) | 1309 (1010 to 1671) | 6.59 (5.08 to 8.41) | 0.17 (-0.14 to 0.66) | 0.73 (0.52 to 0.93) |
| Gabon | 5 (3 to 6) | 1.17 (0.86 to 1.63) | 13 (8 to 21) | 1.77 (1.1 to 2.75) | 1.95 (0.81 to 3.75) | 1.15 (1.02 to 1.27) |
| Gambia | 3 (2 to 4) | 0.72 (0.51 to 0.93) | 13 (8 to 19) | 1.31 (0.84 to 1.91) | 3.84 (2.01 to 6.32) | 1.62 (1.33 to 1.9) |
| Georgia | 52 (39 to 67) | 2.44 (1.83 to 3.14) | 28 (20 to 37) | 2.47 (1.79 to 3.29) | -0.46 (-0.66 to -0.17) | -0.86 (-1.46 to -0.27) |
| Germany | 1004 (844 to 1197) | 3.38 (2.84 to 4.03) | 871 (702 to 1085) | 3.44 (2.77 to 4.29) | -0.13 (-0.35 to 0.19) | -0.64 (-1.08 to -0.2) |
| Ghana | 97 (43 to 136) | 1.68 (0.75 to 2.36) | 160 (107 to 222) | 1.12 (0.75 to 1.55) | 0.65 (-0.02 to 2.91) | -2.67 (-3.48 to -1.85) |
| Greece | 107 (88 to 130) | 2.85 (2.34 to 3.46) | 120 (96 to 149) | 4.32 (3.44 to 5.35) | 0.12 (-0.17 to 0.45) | 1.01 (0.61 to 1.4) |
| Greenland | 1 (1 to 1) | 2.61 (1.97 to 3.38) | 0 (0 to 1) | 1.73 (1.09 to 2.57) | -0.49 (-0.68 to -0.13) | -1.87 (-2.17 to -1.57) |
| Grenada | 2 (2 to 3) | 7.46 (6.45 to 8.76) | 3 (2 to 4) | 7.36 (5.92 to 8.98) | 0.2 (-0.06 to 0.55) | -0.12 (-0.29 to 0.04) |
| Guam | 3 (2 to 4) | 4.7 (3.68 to 5.98) | 4 (3 to 5) | 6.52 (5.05 to 8.59) | 0.21 (-0.14 to 0.68) | 1.84 (1.55 to 2.14) |
| Guatemala | 18 (17 to 19) | 0.6 (0.56 to 0.65) | 59 (49 to 71) | 0.87 (0.73 to 1.04) | 2.33 (1.73 to 3.08) | 1.32 (1.02 to 1.63) |
| Guinea | 10 (7 to 14) | 0.5 (0.36 to 0.67) | 37 (25 to 53) | 0.72 (0.49 to 1.02) | 2.64 (1.28 to 4.78) | 1.21 (1.17 to 1.25) |
| Guinea-Bissau | 4 (3 to 5) | 0.96 (0.7 to 1.29) | 12 (8 to 16) | 1.42 (0.98 to 1.95) | 2.36 (1.31 to 4.02) | 1.33 (1.28 to 1.39) |
| Guyana | 4 (3 to 5) | 1.19 (0.97 to 1.41) | 6 (4 to 7) | 1.84 (1.38 to 2.39) | 0.41 (0.02 to 0.91) | 1.37 (1.08 to 1.67) |
| Haiti | 52 (35 to 80) | 2.14 (1.42 to 3.28) | 117 (74 to 180) | 2.13 (1.35 to 3.29) | 1.24 (0.49 to 2.3) | 0.3 (0.11 to 0.49) |
| Honduras | 10 (8 to 12) | 0.56 (0.45 to 0.7) | 23 (12 to 41) | 0.53 (0.27 to 0.94) | 1.4 (0.18 to 3.19) | -0.72 (-1.06 to -0.37) |
| Hungary | 92 (77 to 112) | 2.49 (2.07 to 3.04) | 113 (88 to 146) | 4.1 (3.21 to 5.31) | 0.23 (-0.1 to 0.66) | 1.22 (1.02 to 1.42) |
| Iceland | 7 (6 to 9) | 6.91 (5.34 to 8.67) | 28 (21 to 38) | 23.44 (17.67 to 31.46) | 2.91 (1.69 to 4.79) | 4.16 (3.86 to 4.46) |
| India | 2714 (2219 to 3239) | 0.8 (0.65 to 0.95) | 6259 (5411 to 7499) | 1.03 (0.89 to 1.23) | 1.31 (0.81 to 1.83) | 0.7 (0.57 to 0.83) |
| Indonesia | 688 (516 to 904) | 0.88 (0.66 to 1.16) | 1326 (991 to 1867) | 1.16 (0.87 to 1.64) | 0.93 (0.43 to 1.63) | 0.84 (0.7 to 0.97) |
| Iran (Islamic Republic of) | 207 (152 to 271) | 0.95 (0.7 to 1.25) | 957 (711 to 1222) | 2.76 (2.05 to 3.52) | 3.63 (2.06 to 5.6) | 3.68 (3.47 to 3.88) |
| Iraq | 114 (84 to 149) | 1.59 (1.17 to 2.07) | 399 (287 to 585) | 2.29 (1.65 to 3.35) | 2.5 (1.3 to 4.72) | 1.38 (1.27 to 1.49) |
| Ireland | 57 (47 to 70) | 4.16 (3.42 to 5.12) | 111 (85 to 142) | 7.08 (5.42 to 9.11) | 0.94 (0.42 to 1.67) | 2.29 (1.8 to 2.8) |
| Israel | 79 (65 to 95) | 4.12 (3.41 to 4.97) | 213 (169 to 263) | 6.41 (5.09 to 7.91) | 1.71 (0.98 to 2.68) | 1.21 (0.63 to 1.78) |
| Italy | 1688 (1344 to 2063) | 7.91 (6.3 to 9.66) | 1319 (1040 to 1623) | 8.35 (6.59 to 10.27) | -0.22 (-0.42 to 0.03) | -0.34 (-0.9 to 0.21) |
| Jamaica | 22 (19 to 25) | 2.23 (1.93 to 2.58) | 48 (35 to 67) | 4.03 (2.91 to 5.65) | 1.2 (0.55 to 2.21) | 0.83 (0.12 to 1.54) |
| Japan | 786 (705 to 879) | 1.75 (1.57 to 1.96) | 713 (584 to 877) | 2.2 (1.8 to 2.71) | -0.09 (-0.29 to 0.17) | 0.77 (0.33 to 1.21) |
| Jordan | 34 (25 to 46) | 2.22 (1.6 to 3) | 226 (164 to 306) | 4.21 (3.05 to 5.71) | 5.64 (3.21 to 9.31) | 2.41 (2.18 to 2.64) |
| Kazakhstan | 174 (148 to 206) | 2.56 (2.17 to 3.03) | 108 (83 to 137) | 1.56 (1.19 to 1.97) | -0.38 (-0.56 to -0.12) | -2.2 (-2.7 to -1.7) |
| Kenya | 54 (38 to 73) | 0.62 (0.44 to 0.83) | 242 (183 to 318) | 1.12 (0.84 to 1.47) | 3.45 (2.12 to 5.24) | 2.06 (1.92 to 2.2) |
| Kiribati | 0 (0 to 0) | 0.39 (0.22 to 0.52) | 0 (0 to 0) | 0.58 (0.3 to 0.84) | 1.43 (0.61 to 2.61) | 1.07 (0.89 to 1.25) |
| Kuwait | 24 (20 to 30) | 2.88 (2.33 to 3.52) | 102 (76 to 131) | 4.8 (3.59 to 6.17) | 3.18 (2.01 to 4.99) | 1.36 (0.61 to 2.12) |
| Kyrgyzstan | 15 (11 to 19) | 0.83 (0.63 to 1.04) | 32 (23 to 43) | 1.17 (0.83 to 1.59) | 1.13 (0.42 to 2.22) | 0.62 (0.25 to 1) |
| Lao People's Democratic Republic | 17 (11 to 25) | 1.07 (0.72 to 1.59) | 41 (26 to 64) | 1.27 (0.82 to 1.99) | 1.47 (0.65 to 2.78) | 0.4 (0.34 to 0.46) |
| Latvia | 8 (7 to 10) | 0.88 (0.76 to 1.02) | 14 (11 to 17) | 2.57 (2.02 to 3.24) | 0.65 (0.25 to 1.2) | 3.09 (2.65 to 3.54) |
| Lebanon | 39 (28 to 55) | 3.39 (2.39 to 4.79) | 138 (96 to 197) | 5.95 (4.12 to 8.49) | 2.53 (1.1 to 4.6) | 2.3 (2.09 to 2.51) |
| Lesotho | 5 (3 to 7) | 0.88 (0.58 to 1.26) | 22 (14 to 31) | 2.64 (1.67 to 3.76) | 3.61 (1.74 to 6.64) | 4.63 (4.11 to 5.14) |
| Liberia | 6 (4 to 8) | 0.64 (0.47 to 0.86) | 29 (19 to 40) | 1.31 (0.86 to 1.77) | 3.93 (2.17 to 6.58) | 2.92 (2.6 to 3.24) |
| Libya | 38 (27 to 57) | 2.28 (1.63 to 3.38) | 154 (103 to 244) | 5.12 (3.44 to 8.14) | 3.01 (1.51 to 5.49) | 3.4 (3 to 3.8) |
| Lithuania | 21 (18 to 26) | 1.51 (1.26 to 1.85) | 32 (25 to 41) | 4.01 (3.14 to 5.14) | 0.53 (0.13 to 1.06) | 2.64 (2.23 to 3.05) |
| Luxembourg | 7 (6 to 8) | 4.79 (3.86 to 5.75) | 10 (8 to 13) | 4.69 (3.63 to 5.99) | 0.46 (0.1 to 1.03) | -0.8 (-1.34 to -0.25) |
| Madagascar | 66 (48 to 82) | 1.45 (1.07 to 1.81) | 197 (136 to 276) | 1.68 (1.16 to 2.35) | 2 (1 to 3.44) | 0.42 (0.27 to 0.57) |
| Malawi | 125 (91 to 163) | 3.34 (2.44 to 4.35) | 421 (265 to 602) | 5.14 (3.24 to 7.35) | 2.38 (1.14 to 4.32) | 1.39 (1.24 to 1.53) |
| Malaysia | 86 (69 to 117) | 1.16 (0.92 to 1.58) | 269 (205 to 358) | 1.94 (1.47 to 2.58) | 2.12 (1.15 to 3.29) | 1.34 (1.12 to 1.56) |
| Maldives | 1 (0 to 1) | 0.78 (0.48 to 1.09) | 3 (2 to 4) | 1.16 (0.83 to 1.56) | 3.79 (1.95 to 7.05) | 1.49 (1.29 to 1.69) |
| Mali | 11 (9 to 14) | 0.38 (0.3 to 0.48) | 38 (27 to 51) | 0.43 (0.31 to 0.57) | 2.37 (1.3 to 3.75) | 0.46 (0.35 to 0.56) |
| Malta | 11 (9 to 14) | 8.04 (6.24 to 10.09) | 14 (10 to 18) | 10.18 (7.81 to 13.24) | 0.23 (-0.12 to 0.7) | 1.13 (0.76 to 1.51) |
| Marshall Islands | 0 (0 to 0) | 1.46 (1.09 to 2.08) | 1 (0 to 1) | 2.67 (1.64 to 3.98) | 1.53 (0.56 to 3.01) | 2.19 (2.04 to 2.34) |
| Mauritania | 5 (3 to 6) | 0.6 (0.43 to 0.79) | 16 (11 to 23) | 0.94 (0.64 to 1.33) | 2.5 (1.25 to 4.24) | 1.29 (1.18 to 1.39) |
| Mauritius | 2 (2 to 2) | 0.4 (0.36 to 0.44) | 9 (8 to 10) | 1.97 (1.7 to 2.29) | 3.52 (2.75 to 4.36) | 3.7 (3.16 to 4.25) |
| Mexico | 418 (404 to 432) | 1.17 (1.13 to 1.21) | 1162 (1050 to 1276) | 2.26 (2.04 to 2.48) | 1.78 (1.47 to 2.07) | 1.74 (1.43 to 2.05) |
| Micronesia (Federated States of) | 1 (0 to 1) | 1.65 (1.14 to 2.36) | 1 (1 to 2) | 2.98 (1.88 to 4.25) | 0.91 (0.17 to 2.26) | 2.05 (1.95 to 2.16) |
| Monaco | 1 (0 to 1) | 7.8 (4.97 to 11.18) | 1 (1 to 2) | 12.77 (7.29 to 19.87) | 0.67 (-0.05 to 1.75) | 1.39 (1.04 to 1.74) |
| Mongolia | 8 (6 to 12) | 0.95 (0.65 to 1.31) | 15 (11 to 21) | 1.22 (0.9 to 1.63) | 0.83 (0.19 to 1.81) | 0.31 (-0.04 to 0.66) |
| Montenegro | 6 (5 to 7) | 2.24 (1.79 to 2.85) | 5 (4 to 7) | 2.58 (1.9 to 3.5) | -0.06 (-0.33 to 0.38) | 0.91 (0.66 to 1.16) |
| Morocco | 101 (74 to 149) | 0.97 (0.71 to 1.43) | 199 (127 to 339) | 1.35 (0.87 to 2.31) | 0.97 (0.26 to 2.36) | 0.93 (0.84 to 1.03) |
| Mozambique | 17 (13 to 21) | 0.35 (0.27 to 0.45) | 73 (50 to 103) | 0.61 (0.41 to 0.86) | 3.39 (1.83 to 5.5) | 2.31 (2.14 to 2.48) |
| Myanmar | 209 (123 to 307) | 1.22 (0.71 to 1.79) | 284 (196 to 411) | 1.26 (0.87 to 1.83) | 0.36 (-0.11 to 1.12) | -0.21 (-0.34 to -0.09) |
| Namibia | 6 (4 to 8) | 1.05 (0.79 to 1.46) | 23 (14 to 36) | 2.21 (1.36 to 3.46) | 2.94 (1.46 to 5.34) | 2.31 (2.05 to 2.57) |
| Nauru | 0 (0 to 0) | 2.3 (1.56 to 3.3) | 0 (0 to 0) | 3.96 (2.55 to 5.71) | 0.98 (0.27 to 2.15) | 1.62 (1.48 to 1.76) |
| Nepal | 51 (36 to 75) | 0.7 (0.5 to 1.02) | 133 (89 to 214) | 0.99 (0.66 to 1.59) | 1.59 (0.59 to 2.94) | 1.17 (0.98 to 1.37) |
| Netherlands | 204 (168 to 249) | 3.38 (2.78 to 4.13) | 250 (198 to 319) | 4.73 (3.74 to 6.05) | 0.23 (-0.08 to 0.67) | 1.01 (0.61 to 1.42) |
| New Zealand | 60 (51 to 72) | 4.34 (3.67 to 5.19) | 129 (106 to 154) | 7.18 (5.89 to 8.57) | 1.16 (0.66 to 1.75) | 1.28 (0.72 to 1.85) |
| Nicaragua | 11 (9 to 14) | 0.74 (0.62 to 0.92) | 37 (29 to 47) | 1.29 (1 to 1.66) | 2.37 (1.5 to 3.46) | 2.07 (1.87 to 2.28) |
| Niger | 13 (9 to 17) | 0.45 (0.31 to 0.61) | 47 (29 to 74) | 0.53 (0.32 to 0.83) | 2.79 (1.48 to 4.59) | 0.54 (0.45 to 0.63) |
| Nigeria | 178 (132 to 234) | 0.52 (0.39 to 0.68) | 680 (450 to 1036) | 0.76 (0.5 to 1.15) | 2.82 (1.46 to 4.9) | 1.14 (1 to 1.27) |
| Niue | 0 (0 to 0) | 1.82 (1.22 to 2.79) | 0 (0 to 0) | 5.46 (3.9 to 7.23) | 1.11 (0.3 to 2.44) | 2.35 (1.97 to 2.72) |
| North Macedonia | 8 (7 to 10) | 1.02 (0.82 to 1.28) | 12 (8 to 15) | 1.54 (1.08 to 2.02) | 0.45 (-0.02 to 1.06) | 1.66 (1.23 to 2.09) |
| Northern Mariana Islands | 0 (0 to 1) | 2.02 (1.29 to 3.22) | 1 (0 to 1) | 3.45 (2.51 to 4.62) | 0.2 (-0.29 to 1.06) | 1.65 (1.3 to 2.01) |
| Norway | 59 (49 to 72) | 3.7 (3.08 to 4.51) | 90 (70 to 115) | 5.06 (3.96 to 6.49) | 0.52 (0.12 to 1.05) | 1.11 (0.35 to 1.87) |
| Oman | 11 (7 to 17) | 1.34 (0.89 to 2.07) | 69 (48 to 104) | 3 (2.06 to 4.49) | 5.24 (2.47 to 9.46) | 3.34 (3.03 to 3.65) |
| Pakistan | 610 (497 to 735) | 1.49 (1.22 to 1.8) | 2641 (1918 to 3558) | 2.67 (1.94 to 3.6) | 3.33 (1.99 to 5.2) | 1.55 (1.31 to 1.8) |
| Palau | 0 (0 to 0) | 1.58 (1.06 to 2.28) | 0 (0 to 0) | 3.26 (2.35 to 4.47) | 0.74 (0.07 to 1.91) | 2.26 (2.1 to 2.42) |
| Palestine | 10 (7 to 14) | 1.31 (0.88 to 1.82) | 45 (32 to 59) | 2.04 (1.47 to 2.69) | 3.44 (1.9 to 6.19) | 1.32 (0.94 to 1.7) |
| Panama | 14 (12 to 16) | 1.37 (1.21 to 1.59) | 54 (41 to 68) | 3.24 (2.51 to 4.13) | 2.86 (1.87 to 4.12) | 2.6 (2.33 to 2.86) |
| Papua New Guinea | 15 (8 to 26) | 0.93 (0.46 to 1.56) | 57 (34 to 87) | 1.32 (0.8 to 2.03) | 2.69 (1.44 to 4.8) | 0.97 (0.83 to 1.11) |
| Paraguay | 14 (11 to 18) | 0.9 (0.73 to 1.15) | 49 (35 to 67) | 1.59 (1.14 to 2.18) | 2.44 (1.33 to 4.05) | 1.78 (1.61 to 1.96) |
| Peru | 282 (223 to 352) | 3.18 (2.52 to 3.97) | 1259 (844 to 1779) | 8.47 (5.68 to 11.97) | 3.46 (1.95 to 5.65) | 3.46 (3.24 to 3.67) |
| Philippines | 333 (270 to 381) | 1.28 (1.04 to 1.47) | 690 (568 to 825) | 1.46 (1.2 to 1.75) | 1.07 (0.68 to 1.59) | 0.34 (0.21 to 0.48) |
| Poland | 206 (190 to 226) | 1.43 (1.32 to 1.56) | 350 (293 to 424) | 2.89 (2.42 to 3.5) | 0.7 (0.39 to 1.09) | 2.05 (1.77 to 2.34) |
| Portugal | 262 (209 to 339) | 6.92 (5.52 to 8.95) | 300 (225 to 388) | 10.15 (7.63 to 13.15) | 0.14 (-0.23 to 0.62) | 1.08 (0.67 to 1.48) |
| Puerto Rico | 82 (69 to 98) | 5.78 (4.85 to 6.89) | 80 (62 to 100) | 7.71 (6.01 to 9.69) | -0.02 (-0.29 to 0.31) | 0.67 (0.35 to 1) |
| Qatar | 3 (2 to 4) | 1.37 (1.02 to 1.88) | 52 (36 to 74) | 3.16 (2.17 to 4.47) | 15.11 (8.92 to 23.54) | 3.07 (2.72 to 3.42) |
| Republic of Korea | 256 (220 to 309) | 1.22 (1.05 to 1.47) | 372 (271 to 489) | 2.33 (1.69 to 3.06) | 0.45 (0 to 0.97) | 2.01 (1.69 to 2.33) |
| Republic of Moldova | 33 (29 to 38) | 1.91 (1.66 to 2.2) | 32 (26 to 39) | 2.59 (2.07 to 3.18) | -0.04 (-0.26 to 0.22) | 1.46 (0.92 to 2) |
| Romania | 105 (95 to 116) | 1.21 (1.09 to 1.33) | 90 (74 to 110) | 1.67 (1.37 to 2.04) | -0.14 (-0.32 to 0.08) | 1.46 (1.14 to 1.78) |
| Russian Federation | 1393 (1345 to 1443) | 2.4 (2.31 to 2.48) | 1861 (1724 to 2001) | 4 (3.71 to 4.31) | 0.34 (0.22 to 0.45) | 1.37 (0.84 to 1.9) |
| Rwanda | 71 (51 to 94) | 2.58 (1.86 to 3.45) | 122 (84 to 174) | 2.16 (1.48 to 3.07) | 0.73 (0.06 to 1.7) | -1.37 (-1.78 to -0.96) |
| Saint Kitts and Nevis | 1 (0 to 1) | 3.19 (2.87 to 3.56) | 1 (0 to 1) | 2.22 (1.58 to 3.2) | -0.08 (-0.35 to 0.36) | -1.84 (-2.49 to -1.2) |
| Saint Lucia | 2 (2 to 2) | 3.94 (3.51 to 4.4) | 3 (3 to 4) | 5.12 (4.05 to 6.46) | 0.53 (0.17 to 0.95) | 0.8 (0.6 to 1.01) |
| Saint Vincent and the Grenadines | 2 (2 to 3) | 4.92 (4.37 to 5.65) | 2 (2 to 3) | 5.53 (4.5 to 6.66) | 0.01 (-0.2 to 0.29) | 0.13 (-0.03 to 0.3) |
| Samoa | 2 (1 to 3) | 2.3 (1.54 to 4.05) | 3 (2 to 5) | 3.71 (2.36 to 6.54) | 0.94 (0.24 to 1.99) | 1.38 (1.25 to 1.5) |
| San Marino | 1 (1 to 1) | 11.33 (8.55 to 14.81) | 1 (1 to 1) | 10.76 (6.7 to 16.45) | -0.09 (-0.48 to 0.49) | 0.48 (-0.02 to 0.98) |
| Sao Tome and Principe | 0 (0 to 0) | 0.5 (0.31 to 0.85) | 1 (1 to 2) | 1.24 (0.74 to 2.08) | 4.23 (1.83 to 8.97) | 2.81 (2.36 to 3.26) |
| Saudi Arabia | 79 (56 to 108) | 1.19 (0.84 to 1.62) | 887 (586 to 1319) | 4.79 (3.16 to 7.12) | 10.25 (5.47 to 17.66) | 5.14 (4.91 to 5.37) |
| Senegal | 17 (13 to 23) | 0.62 (0.46 to 0.82) | 65 (46 to 89) | 1 (0.71 to 1.38) | 2.77 (1.67 to 4.64) | 1.72 (1.53 to 1.91) |
| Serbia | 59 (47 to 74) | 1.63 (1.3 to 2.06) | 49 (36 to 65) | 1.67 (1.23 to 2.2) | -0.16 (-0.42 to 0.17) | 0.17 (0.04 to 0.3) |
| Seychelles | 1 (0 to 1) | 1.82 (1.49 to 2.36) | 1 (1 to 1) | 2.81 (2.13 to 3.55) | 0.9 (0.35 to 1.67) | 1.61 (1.2 to 2.02) |
| Sierra Leone | 8 (5 to 11) | 0.51 (0.34 to 0.71) | 35 (23 to 49) | 0.93 (0.62 to 1.3) | 3.27 (1.89 to 5.59) | 2.16 (2.06 to 2.27) |
| Singapore | 19 (17 to 22) | 1.27 (1.1 to 1.46) | 46 (36 to 58) | 2.41 (1.88 to 3.02) | 1.42 (0.83 to 2.09) | 1.68 (1.48 to 1.88) |
| Slovakia | 44 (35 to 61) | 2.13 (1.71 to 2.99) | 58 (43 to 79) | 3.4 (2.49 to 4.61) | 0.33 (-0.13 to 0.93) | 1.97 (1.82 to 2.11) |
| Slovenia | 34 (27 to 44) | 4.49 (3.52 to 5.71) | 66 (49 to 88) | 11.64 (8.65 to 15.47) | 0.93 (0.3 to 1.7) | 3.59 (3.29 to 3.9) |
| Solomon Islands | 1 (1 to 2) | 0.99 (0.49 to 1.73) | 6 (4 to 8) | 2.02 (1.31 to 2.91) | 3.35 (1.66 to 6.47) | 2.34 (2.23 to 2.45) |
| Somalia | 46 (31 to 65) | 1.57 (1.07 to 2.25) | 137 (89 to 196) | 1.66 (1.08 to 2.37) | 2.02 (0.99 to 3.46) | 0.3 (0.18 to 0.41) |
| South Africa | 396 (343 to 476) | 2.52 (2.18 to 3.02) | 874 (667 to 1073) | 3.61 (2.75 to 4.43) | 1.21 (0.61 to 1.77) | 1.17 (0.47 to 1.89) |
| South Sudan | 29 (19 to 41) | 1.25 (0.84 to 1.79) | 66 (43 to 97) | 1.85 (1.18 to 2.69) | 1.31 (0.54 to 2.43) | 1.2 (0.85 to 1.56) |
| Spain | 705 (584 to 843) | 4.75 (3.94 to 5.69) | 489 (376 to 609) | 3.94 (3.02 to 4.91) | -0.31 (-0.49 to -0.06) | -1.38 (-1.71 to -1.06) |
| Sri Lanka | 90 (70 to 121) | 1.22 (0.95 to 1.63) | 143 (92 to 200) | 1.78 (1.15 to 2.48) | 0.59 (-0.01 to 1.45) | 0.91 (0.61 to 1.21) |
| Sudan | 68 (36 to 132) | 0.89 (0.47 to 1.73) | 263 (160 to 426) | 1.42 (0.86 to 2.31) | 2.85 (1.03 to 6.48) | 1.61 (1.43 to 1.79) |
| Suriname | 4 (2 to 4) | 2.25 (1.53 to 2.72) | 6 (4 to 7) | 2.66 (2.03 to 3.38) | 0.56 (0.08 to 1.47) | 0.46 (0.14 to 0.78) |
| Sweden | 82 (70 to 98) | 2.81 (2.37 to 3.34) | 103 (82 to 127) | 3.17 (2.52 to 3.92) | 0.25 (-0.06 to 0.63) | 1.03 (0.62 to 1.43) |
| Switzerland | 164 (134 to 203) | 6.21 (5.08 to 7.7) | 197 (152 to 249) | 7.1 (5.49 to 8.97) | 0.2 (-0.13 to 0.64) | -0.12 (-0.63 to 0.38) |
| Syrian Arab Republic | 63 (41 to 84) | 1.31 (0.86 to 1.76) | 95 (62 to 136) | 1.86 (1.23 to 2.68) | 0.51 (-0.08 to 1.58) | 1.07 (0.73 to 1.41) |
| Taiwan (Province of China) | 192 (174 to 214) | 2.09 (1.88 to 2.32) | 214 (174 to 261) | 2.83 (2.3 to 3.46) | 0.11 (-0.11 to 0.39) | 0.79 (0.58 to 1) |
| Tajikistan | 38 (26 to 53) | 1.78 (1.21 to 2.5) | 79 (54 to 109) | 1.91 (1.3 to 2.62) | 1.11 (0.31 to 2.35) | -1.1 (-1.71 to -0.49) |
| Thailand | 306 (242 to 447) | 1.18 (0.93 to 1.72) | 779 (558 to 1147) | 3.67 (2.63 to 5.41) | 1.55 (0.8 to 2.61) | 2.36 (1.67 to 3.06) |
| Timor-Leste | 2 (1 to 3) | 0.59 (0.39 to 0.85) | 4 (3 to 6) | 0.76 (0.54 to 1.08) | 1.33 (0.55 to 2.5) | 0.93 (0.24 to 1.62) |
| Togo | 8 (6 to 11) | 0.61 (0.46 to 0.82) | 38 (24 to 53) | 1.12 (0.73 to 1.56) | 3.49 (1.81 to 5.88) | 2.03 (1.92 to 2.14) |
| Tokelau | 0 (0 to 0) | 1.44 (0.91 to 2.16) | 0 (0 to 0) | 5.27 (3.74 to 7.39) | 2.13 (1 to 3.95) | 3.04 (2.54 to 3.53) |
| Tonga | 1 (1 to 2) | 3.27 (2.43 to 4.39) | 2 (1 to 3) | 5.78 (3.83 to 8.76) | 0.86 (0.15 to 2.2) | 1.65 (1.51 to 1.79) |
| Trinidad and Tobago | 14 (12 to 15) | 2.73 (2.49 to 3.06) | 21 (15 to 28) | 4.22 (3.03 to 5.62) | 0.53 (0.09 to 1.11) | 1.52 (1.25 to 1.78) |
| Tunisia | 55 (42 to 79) | 1.59 (1.21 to 2.28) | 168 (109 to 251) | 3.87 (2.5 to 5.77) | 2.09 (1 to 3.71) | 2.81 (2.73 to 2.9) |
| T眉rkiye | 662 (492 to 854) | 2.77 (2.06 to 3.57) | 1244 (892 to 1633) | 3.91 (2.8 to 5.12) | 0.88 (0.22 to 1.75) | 1.28 (1.06 to 1.51) |
| Turkmenistan | 7 (6 to 9) | 0.44 (0.37 to 0.56) | 19 (14 to 26) | 0.92 (0.69 to 1.24) | 1.83 (0.91 to 2.99) | 2.25 (1.84 to 2.67) |
| Tuvalu | 0 (0 to 0) | 1.38 (0.94 to 1.96) | 0 (0 to 0) | 2.57 (1.78 to 3.61) | 1.57 (0.72 to 2.78) | 1.94 (1.87 to 2.02) |
| Uganda | 103 (72 to 140) | 1.61 (1.12 to 2.18) | 606 (407 to 841) | 3.52 (2.36 to 4.89) | 4.87 (2.56 to 8.58) | 1.92 (1.64 to 2.19) |
| Ukraine | 318 (263 to 418) | 1.67 (1.38 to 2.2) | 391 (278 to 523) | 2.84 (2.02 to 3.79) | 0.23 (-0.22 to 0.78) | 1.12 (0.83 to 1.41) |
| United Arab Emirates | 16 (11 to 23) | 1.65 (1.1 to 2.45) | 99 (71 to 135) | 2.47 (1.76 to 3.37) | 5.29 (2.85 to 8.61) | 1.42 (1.16 to 1.69) |
| United Kingdom | 854 (807 to 898) | 4.09 (3.86 to 4.3) | 1296 (1207 to 1384) | 5.96 (5.55 to 6.36) | 0.52 (0.39 to 0.65) | 0.95 (0.56 to 1.34) |
| United Republic of Tanzania | 159 (114 to 214) | 1.64 (1.18 to 2.2) | 471 (318 to 645) | 2.02 (1.36 to 2.77) | 1.97 (0.97 to 3.25) | 0.54 (0.48 to 0.61) |
| United States of America | 6606 (6290 to 6920) | 6.47 (6.16 to 6.77) | 4410 (4174 to 4669) | 3.96 (3.75 to 4.19) | -0.33 (-0.38 to -0.27) | -2.25 (-2.52 to -1.98) |
| United States Virgin Islands | 2 (1 to 2) | 3.92 (3.02 to 5.05) | 2 (1 to 2) | 7.22 (5.23 to 10.11) | 0.07 (-0.27 to 0.59) | 2.41 (2.18 to 2.64) |
| Uruguay | 38 (33 to 44) | 3.36 (2.91 to 3.89) | 71 (58 to 87) | 5.9 (4.82 to 7.27) | 0.85 (0.44 to 1.4) | 1.62 (1.42 to 1.81) |
| Uzbekistan | 111 (89 to 138) | 1.3 (1.04 to 1.61) | 215 (168 to 276) | 1.56 (1.22 to 2.01) | 0.93 (0.34 to 1.72) | 0.25 (0.05 to 0.45) |
| Vanuatu | 1 (0 to 1) | 1.1 (0.67 to 1.73) | 2 (2 to 3) | 1.94 (1.32 to 2.68) | 2.75 (1.28 to 5.18) | 1.63 (1.55 to 1.72) |
| Venezuela (Bolivarian Republic of) | 157 (140 to 177) | 1.96 (1.75 to 2.2) | 320 (228 to 434) | 3.42 (2.43 to 4.64) | 1.04 (0.41 to 1.85) | 2.07 (1.73 to 2.4) |
| Viet Nam | 259 (189 to 353) | 0.91 (0.66 to 1.24) | 733 (506 to 1061) | 1.91 (1.32 to 2.76) | 1.82 (0.85 to 3.3) | 2.42 (2.21 to 2.63) |
| Yemen | 25 (13 to 45) | 0.53 (0.28 to 0.98) | 103 (64 to 162) | 0.75 (0.46 to 1.17) | 3.17 (1.65 to 5.86) | 1.38 (1.15 to 1.62) |
| Zambia | 54 (40 to 71) | 1.8 (1.33 to 2.35) | 246 (126 to 517) | 3.04 (1.56 to 6.39) | 3.52 (1.25 to 8.34) | 1.52 (1.31 to 1.73) |
| Zimbabwe | 61 (45 to 79) | 1.55 (1.14 to 2) | 283 (188 to 389) | 4.46 (2.97 to 6.14) | 3.61 (1.93 to 5.81) | 4.16 (3.18 to 5.16) |
| **Location** | **Death cases in 1990** | **Death rate in 1990** | **Death cases in 2021** | **Death rate in 2021** | **Cases change** | **EAPC** |
| Afghanistan | 27 (15 to 52) | 0.87 (0.46 to 1.66) | 114 (69 to 199) | 0.93 (0.56 to 1.63) | 3.18 (1.95 to 5.74) | 0.37 (0.21 to 0.52) |
| Albania | 4 (4 to 5) | 0.32 (0.26 to 0.38) | 2 (2 to 3) | 0.23 (0.17 to 0.3) | -0.52 (-0.64 to -0.31) | -1.24 (-1.73 to -0.74) |
| Algeria | 69 (54 to 103) | 0.69 (0.53 to 1.02) | 112 (85 to 161) | 0.66 (0.5 to 0.95) | 0.61 (0.17 to 1.2) | -0.32 (-0.43 to -0.21) |
| American Samoa | 0 (0 to 0) | 0.66 (0.5 to 0.89) | 0 (0 to 0) | 1.07 (0.75 to 1.42) | 0.41 (-0.13 to 1.18) | 1.96 (1.74 to 2.19) |
| Andorra | 0 (0 to 1) | 1.46 (1.05 to 2) | 0 (0 to 0) | 0.89 (0.61 to 1.19) | -0.38 (-0.6 to -0.04) | -1.37 (-1.65 to -1.1) |
| Angola | 26 (17 to 36) | 0.66 (0.45 to 0.92) | 87 (53 to 131) | 0.72 (0.44 to 1.08) | 2.38 (1.13 to 4.33) | 0.61 (0.39 to 0.83) |
| Antigua and Barbuda | 0 (0 to 0) | 1.38 (1.26 to 1.51) | 0 (0 to 0) | 0.82 (0.73 to 0.94) | -0.21 (-0.31 to -0.08) | -0.79 (-1.16 to -0.42) |
| Argentina | 169 (158 to 181) | 1.39 (1.29 to 1.48) | 148 (135 to 162) | 0.84 (0.77 to 0.93) | -0.13 (-0.23 to -0.01) | -1.29 (-1.45 to -1.13) |
| Armenia | 7 (6 to 8) | 0.49 (0.42 to 0.55) | 5 (4 to 6) | 0.47 (0.38 to 0.55) | -0.28 (-0.44 to -0.06) | -0.18 (-0.83 to 0.47) |
| Australia | 67 (62 to 72) | 0.99 (0.92 to 1.06) | 40 (37 to 44) | 0.47 (0.43 to 0.51) | -0.39 (-0.46 to -0.31) | -2.94 (-3.13 to -2.74) |
| Austria | 21 (20 to 22) | 0.7 (0.65 to 0.74) | 13 (12 to 14) | 0.46 (0.43 to 0.5) | -0.38 (-0.43 to -0.31) | -1.8 (-2.04 to -1.56) |
| Azerbaijan | 17 (11 to 25) | 0.52 (0.34 to 0.77) | 17 (10 to 26) | 0.4 (0.24 to 0.61) | 0.01 (-0.44 to 0.99) | -1.97 (-2.53 to -1.41) |
| Bahamas | 2 (2 to 2) | 1.9 (1.73 to 2.08) | 3 (2 to 4) | 1.97 (1.54 to 2.47) | 0.36 (0.06 to 0.77) | -0.06 (-0.21 to 0.09) |
| Bahrain | 2 (2 to 3) | 0.92 (0.71 to 1.14) | 5 (4 to 6) | 0.71 (0.56 to 0.88) | 1.13 (0.53 to 1.86) | -1.21 (-1.53 to -0.89) |
| Bangladesh | 249 (186 to 315) | 0.59 (0.44 to 0.75) | 302 (199 to 499) | 0.44 (0.29 to 0.73) | 0.21 (-0.25 to 0.85) | -1.1 (-1.3 to -0.91) |
| Barbados | 3 (3 to 3) | 2.54 (2.37 to 2.71) | 2 (2 to 2) | 1.97 (1.55 to 2.52) | -0.3 (-0.46 to -0.1) | -1.14 (-1.36 to -0.92) |
| Belarus | 15 (13 to 17) | 0.37 (0.32 to 0.43) | 23 (18 to 28) | 0.79 (0.63 to 0.96) | 0.57 (0.22 to 0.99) | 2.06 (1.71 to 2.42) |
| Belgium | 29 (27 to 32) | 0.79 (0.73 to 0.86) | 19 (17 to 21) | 0.54 (0.48 to 0.6) | -0.36 (-0.45 to -0.27) | -1.86 (-2.11 to -1.61) |
| Belize | 0 (0 to 0) | 0.58 (0.54 to 0.63) | 1 (1 to 1) | 0.69 (0.62 to 0.78) | 2.1 (1.72 to 2.54) | 0.65 (0.3 to 1.01) |
| Benin | 7 (5 to 9) | 0.43 (0.32 to 0.56) | 30 (20 to 42) | 0.57 (0.38 to 0.8) | 3.14 (1.69 to 4.94) | 0.83 (0.69 to 0.97) |
| Bermuda | 1 (1 to 1) | 2.3 (2.06 to 2.56) | 0 (0 to 0) | 1.14 (0.93 to 1.41) | -0.66 (-0.73 to -0.58) | -2.13 (-2.47 to -1.79) |
| Bhutan | 2 (1 to 2) | 0.61 (0.41 to 0.88) | 2 (1 to 3) | 0.51 (0.31 to 0.87) | 0.06 (-0.44 to 0.86) | -0.93 (-1.03 to -0.84) |
| Bolivia (Plurinational State of) | 32 (24 to 41) | 1.3 (0.97 to 1.67) | 54 (38 to 77) | 1.11 (0.76 to 1.57) | 0.69 (0.09 to 1.61) | -0.82 (-0.96 to -0.68) |
| Bosnia and Herzegovina | 9 (8 to 11) | 0.47 (0.41 to 0.57) | 5 (3 to 6) | 0.46 (0.31 to 0.6) | -0.49 (-0.66 to -0.32) | -0.02 (-0.26 to 0.22) |
| Botswana | 5 (3 to 7) | 0.97 (0.62 to 1.43) | 12 (8 to 18) | 1.12 (0.73 to 1.67) | 1.4 (0.52 to 2.87) | 0.52 (0.26 to 0.78) |
| Brazil | 516 (499 to 534) | 0.82 (0.8 to 0.85) | 694 (666 to 724) | 0.81 (0.78 to 0.85) | 0.35 (0.28 to 0.42) | -0.36 (-0.54 to -0.18) |
| Brunei Darussalam | 2 (2 to 3) | 1.62 (1.29 to 2.06) | 2 (2 to 3) | 1.19 (0.95 to 1.45) | 0.22 (-0.08 to 0.67) | -0.94 (-1.32 to -0.57) |
| Bulgaria | 21 (19 to 23) | 0.7 (0.64 to 0.76) | 15 (12 to 18) | 0.79 (0.66 to 0.94) | -0.28 (-0.41 to -0.12) | 0.68 (0.39 to 0.96) |
| Burkina Faso | 14 (10 to 19) | 0.44 (0.3 to 0.59) | 54 (36 to 76) | 0.62 (0.42 to 0.87) | 2.86 (1.6 to 4.75) | 1.33 (1.19 to 1.48) |
| Burundi | 35 (23 to 50) | 1.66 (1.1 to 2.43) | 67 (46 to 98) | 1.27 (0.88 to 1.86) | 0.94 (0.27 to 2.09) | -1.32 (-1.6 to -1.04) |
| Cabo Verde | 0 (0 to 1) | 0.24 (0.19 to 0.41) | 2 (1 to 3) | 0.78 (0.36 to 1.14) | 5.12 (0.91 to 8.88) | 2.92 (1.74 to 4.11) |
| Cambodia | 32 (23 to 46) | 0.83 (0.6 to 1.19) | 70 (49 to 103) | 0.97 (0.67 to 1.42) | 1.2 (0.36 to 2.49) | 0.24 (0.13 to 0.36) |
| Cameroon | 23 (17 to 30) | 0.61 (0.46 to 0.78) | 117 (77 to 162) | 0.91 (0.6 to 1.26) | 4.05 (2.24 to 6.63) | 1.26 (1.13 to 1.4) |
| Canada | 112 (104 to 120) | 1.01 (0.93 to 1.08) | 65 (57 to 74) | 0.55 (0.48 to 0.62) | -0.42 (-0.49 to -0.33) | -2.73 (-3.11 to -2.35) |
| Central African Republic | 9 (6 to 12) | 0.84 (0.61 to 1.16) | 20 (13 to 27) | 0.9 (0.59 to 1.26) | 1.25 (0.53 to 2.2) | 0.16 (0.07 to 0.24) |
| Chad | 7 (5 to 10) | 0.33 (0.23 to 0.46) | 32 (22 to 47) | 0.51 (0.34 to 0.75) | 3.66 (2.12 to 5.85) | 1.55 (1.31 to 1.79) |
| Chile | 57 (53 to 61) | 0.99 (0.92 to 1.07) | 50 (46 to 55) | 0.71 (0.65 to 0.78) | -0.12 (-0.21 to 0) | -1.25 (-1.47 to -1.02) |
| China | 3928 (3295 to 4640) | 0.72 (0.6 to 0.85) | 2888 (2266 to 3482) | 0.63 (0.49 to 0.75) | -0.26 (-0.44 to -0.05) | -0.63 (-0.91 to -0.34) |
| Colombia | 148 (138 to 158) | 1.05 (0.98 to 1.12) | 168 (141 to 197) | 0.84 (0.7 to 0.98) | 0.14 (-0.05 to 0.34) | -0.7 (-0.9 to -0.51) |
| Comoros | 2 (1 to 3) | 1.27 (0.49 to 1.91) | 5 (3 to 6) | 1.48 (0.99 to 2.09) | 1.08 (0.21 to 4.87) | -0.32 (-1.01 to 0.38) |
| Congo | 9 (6 to 12) | 0.9 (0.64 to 1.3) | 22 (15 to 33) | 1 (0.67 to 1.49) | 1.62 (0.72 to 3.19) | 0.27 (0.05 to 0.49) |
| Cook Islands | 0 (0 to 0) | 0.37 (0.27 to 0.5) | 0 (0 to 0) | 0.44 (0.3 to 0.64) | -0.1 (-0.46 to 0.47) | 1.15 (0.79 to 1.52) |
| Costa Rica | 12 (11 to 13) | 0.93 (0.86 to 1.03) | 23 (20 to 26) | 1.21 (1.07 to 1.37) | 0.92 (0.66 to 1.24) | 0.44 (0.2 to 0.69) |
| C么te d'Ivoire | 34 (26 to 46) | 0.73 (0.55 to 0.97) | 106 (74 to 145) | 0.94 (0.66 to 1.29) | 2.09 (1.06 to 3.5) | 0.91 (0.76 to 1.05) |
| Croatia | 15 (13 to 17) | 0.81 (0.7 to 0.92) | 8 (7 to 10) | 0.67 (0.55 to 0.81) | -0.43 (-0.54 to -0.3) | -0.63 (-1.05 to -0.2) |
| Cuba | 79 (73 to 86) | 1.63 (1.5 to 1.75) | 37 (32 to 42) | 1.02 (0.88 to 1.17) | -0.54 (-0.61 to -0.45) | -1.81 (-2.2 to -1.42) |
| Cyprus | 2 (2 to 2) | 0.61 (0.5 to 0.79) | 2 (2 to 3) | 0.42 (0.33 to 0.53) | 0.14 (-0.14 to 0.49) | -1.55 (-2.04 to -1.06) |
| Czechia | 28 (26 to 31) | 0.76 (0.7 to 0.84) | 20 (16 to 24) | 0.68 (0.56 to 0.83) | -0.29 (-0.44 to -0.11) | 0.35 (0 to 0.71) |
| Democratic People's Republic of Korea | 63 (42 to 94) | 0.76 (0.51 to 1.12) | 85 (58 to 128) | 0.85 (0.58 to 1.27) | 0.35 (-0.16 to 1.05) | 0.2 (0.14 to 0.27) |
| Democratic Republic of the Congo | 81 (55 to 114) | 0.57 (0.39 to 0.8) | 230 (161 to 330) | 0.64 (0.45 to 0.92) | 1.83 (0.99 to 3.06) | 0.4 (0.18 to 0.63) |
| Denmark | 11 (10 to 12) | 0.57 (0.52 to 0.62) | 6 (5 to 7) | 0.32 (0.29 to 0.36) | -0.45 (-0.53 to -0.38) | -2.23 (-2.56 to -1.91) |
| Djibouti | 2 (1 to 2) | 0.88 (0.56 to 1.27) | 6 (4 to 10) | 1.18 (0.7 to 1.81) | 3.11 (1.54 to 5.76) | 0.88 (0.56 to 1.19) |
| Dominica | 1 (0 to 1) | 1.76 (1.45 to 2.1) | 1 (0 to 1) | 2.13 (1.55 to 2.83) | 0.07 (-0.26 to 0.49) | 0.87 (0.62 to 1.12) |
| Dominican Republic | 22 (18 to 26) | 0.71 (0.59 to 0.84) | 40 (30 to 52) | 0.88 (0.65 to 1.13) | 0.85 (0.38 to 1.39) | 1.54 (1.19 to 1.89) |
| Ecuador | 38 (35 to 42) | 0.93 (0.86 to 1.01) | 81 (64 to 101) | 1.11 (0.88 to 1.38) | 1.11 (0.65 to 1.67) | 0.74 (0.26 to 1.22) |
| Egypt | 141 (119 to 175) | 0.64 (0.54 to 0.8) | 182 (136 to 297) | 0.43 (0.32 to 0.7) | 0.29 (-0.06 to 0.9) | -1.46 (-1.66 to -1.26) |
| El Salvador | 12 (10 to 14) | 0.56 (0.5 to 0.67) | 18 (14 to 23) | 0.7 (0.53 to 0.89) | 0.56 (0.15 to 1.03) | 0.96 (0.69 to 1.24) |
| Equatorial Guinea | 1 (1 to 2) | 0.74 (0.49 to 1.09) | 6 (3 to 10) | 0.84 (0.49 to 1.42) | 4.24 (2.02 to 8.23) | 0.46 (0.17 to 0.75) |
| Eritrea | 17 (12 to 23) | 1.31 (0.94 to 1.74) | 41 (26 to 60) | 1.48 (0.94 to 2.16) | 1.43 (0.5 to 2.57) | 0.29 (0.16 to 0.42) |
| Estonia | 4 (3 to 4) | 0.63 (0.54 to 0.74) | 3 (3 to 4) | 0.8 (0.68 to 0.94) | -0.12 (-0.3 to 0.1) | -0.2 (-0.68 to 0.29) |
| Eswatini | 3 (2 to 4) | 1.05 (0.74 to 1.49) | 11 (6 to 17) | 2.23 (1.22 to 3.32) | 2.6 (1.06 to 4.86) | 2.79 (2.11 to 3.48) |
| Ethiopia | 276 (182 to 390) | 1.51 (1 to 2.14) | 470 (340 to 634) | 1.01 (0.73 to 1.37) | 0.7 (0.26 to 1.83) | -1.68 (-1.88 to -1.48) |
| Fiji | 2 (1 to 2) | 0.55 (0.43 to 0.72) | 3 (2 to 4) | 0.76 (0.52 to 1.03) | 0.53 (0 to 1.29) | 1.62 (1.34 to 1.9) |
| Finland | 18 (17 to 20) | 1.02 (0.93 to 1.1) | 11 (10 to 13) | 0.68 (0.61 to 0.76) | -0.39 (-0.46 to -0.3) | -1.11 (-1.23 to -0.99) |
| France | 212 (194 to 230) | 0.96 (0.88 to 1.04) | 103 (92 to 115) | 0.52 (0.46 to 0.58) | -0.51 (-0.57 to -0.44) | -2.34 (-2.51 to -2.18) |
| Gabon | 3 (2 to 5) | 0.87 (0.63 to 1.19) | 7 (5 to 11) | 0.98 (0.61 to 1.49) | 1.2 (0.34 to 2.5) | 0.22 (0.08 to 0.36) |
| Gambia | 2 (1 to 3) | 0.53 (0.37 to 0.69) | 8 (5 to 12) | 0.81 (0.54 to 1.19) | 3.1 (1.63 to 5.08) | 1.09 (0.79 to 1.38) |
| Georgia | 23 (17 to 29) | 1.08 (0.82 to 1.38) | 10 (7 to 12) | 0.86 (0.65 to 1.09) | -0.58 (-0.72 to -0.38) | -1.39 (-1.98 to -0.81) |
| Germany | 217 (202 to 232) | 0.73 (0.68 to 0.78) | 93 (84 to 102) | 0.37 (0.33 to 0.4) | -0.57 (-0.62 to -0.52) | -2.65 (-2.92 to -2.39) |
| Ghana | 71 (31 to 99) | 1.23 (0.54 to 1.73) | 95 (65 to 133) | 0.67 (0.46 to 0.93) | 0.35 (-0.22 to 2.18) | -3.22 (-3.99 to -2.43) |
| Greece | 15 (14 to 16) | 0.41 (0.38 to 0.43) | 12 (11 to 12) | 0.41 (0.38 to 0.44) | -0.25 (-0.33 to -0.18) | -0.21 (-0.43 to 0) |
| Greenland | 0 (0 to 0) | 1.43 (1.09 to 1.82) | 0 (0 to 0) | 0.63 (0.42 to 0.96) | -0.66 (-0.78 to -0.48) | -3.14 (-3.41 to -2.87) |
| Grenada | 2 (1 to 2) | 4.56 (4.01 to 5.17) | 1 (1 to 2) | 3.25 (2.76 to 3.82) | -0.14 (-0.3 to 0.07) | -1.01 (-1.21 to -0.8) |
| Guam | 1 (1 to 1) | 1.07 (0.87 to 1.22) | 1 (1 to 1) | 1.17 (1.01 to 1.38) | -0.04 (-0.19 to 0.16) | 0.93 (0.44 to 1.42) |
| Guatemala | 13 (12 to 13) | 0.43 (0.41 to 0.45) | 29 (25 to 33) | 0.43 (0.37 to 0.49) | 1.3 (0.99 to 1.66) | 0.1 (-0.2 to 0.4) |
| Guinea | 8 (6 to 11) | 0.39 (0.28 to 0.52) | 26 (18 to 38) | 0.51 (0.35 to 0.74) | 2.25 (1.07 to 4.13) | 0.89 (0.83 to 0.94) |
| Guinea-Bissau | 3 (2 to 4) | 0.79 (0.57 to 1.04) | 9 (6 to 12) | 1.03 (0.73 to 1.41) | 1.97 (1.05 to 3.47) | 0.95 (0.86 to 1.03) |
| Guyana | 3 (2 to 3) | 0.86 (0.7 to 1) | 3 (3 to 4) | 1.11 (0.84 to 1.42) | 0.18 (-0.13 to 0.55) | 0.94 (0.67 to 1.2) |
| Haiti | 43 (29 to 67) | 1.76 (1.18 to 2.76) | 87 (55 to 134) | 1.59 (1 to 2.45) | 1.04 (0.36 to 2.05) | -0.03 (-0.21 to 0.16) |
| Honduras | 6 (5 to 8) | 0.37 (0.29 to 0.46) | 12 (6 to 21) | 0.28 (0.14 to 0.49) | 0.92 (-0.02 to 2.47) | -1.41 (-1.74 to -1.08) |
| Hungary | 36 (33 to 40) | 0.98 (0.88 to 1.09) | 20 (17 to 23) | 0.73 (0.62 to 0.84) | -0.45 (-0.55 to -0.34) | -1.26 (-1.54 to -0.99) |
| Iceland | 1 (1 to 1) | 0.54 (0.49 to 0.59) | 1 (1 to 1) | 0.63 (0.56 to 0.71) | 0.34 (0.16 to 0.59) | 0.74 (0.34 to 1.13) |
| India | 1978 (1632 to 2374) | 0.58 (0.48 to 0.7) | 3010 (2620 to 3612) | 0.49 (0.43 to 0.59) | 0.52 (0.21 to 0.87) | -0.67 (-0.86 to -0.48) |
| Indonesia | 550 (413 to 726) | 0.71 (0.53 to 0.93) | 807 (607 to 1127) | 0.71 (0.53 to 0.99) | 0.47 (0.1 to 0.99) | 0 (-0.16 to 0.16) |
| Iran (Islamic Republic of) | 106 (84 to 133) | 0.49 (0.39 to 0.61) | 216 (171 to 241) | 0.62 (0.49 to 0.7) | 1.04 (0.46 to 1.64) | 1.09 (0.92 to 1.27) |
| Iraq | 67 (49 to 87) | 0.93 (0.69 to 1.21) | 122 (90 to 177) | 0.7 (0.51 to 1.02) | 0.83 (0.21 to 1.9) | -0.9 (-1.11 to -0.69) |
| Ireland | 10 (10 to 11) | 0.76 (0.7 to 0.83) | 8 (7 to 9) | 0.5 (0.45 to 0.56) | -0.25 (-0.35 to -0.14) | -1.2 (-1.52 to -0.88) |
| Israel | 17 (16 to 19) | 0.91 (0.84 to 1) | 21 (19 to 23) | 0.63 (0.57 to 0.7) | 0.2 (0.05 to 0.37) | -1.61 (-2.07 to -1.15) |
| Italy | 242 (234 to 251) | 1.13 (1.1 to 1.18) | 91 (86 to 95) | 0.57 (0.54 to 0.6) | -0.63 (-0.65 to -0.6) | -2.65 (-2.97 to -2.32) |
| Jamaica | 11 (10 to 12) | 1.1 (1.01 to 1.22) | 18 (14 to 25) | 1.53 (1.15 to 2.08) | 0.69 (0.23 to 1.37) | 0.02 (-0.68 to 0.73) |
| Japan | 313 (308 to 318) | 0.7 (0.69 to 0.71) | 121 (118 to 124) | 0.37 (0.37 to 0.38) | -0.61 (-0.62 to -0.6) | -2.1 (-2.24 to -1.97) |
| Jordan | 18 (13 to 23) | 1.15 (0.87 to 1.52) | 53 (40 to 69) | 0.99 (0.74 to 1.28) | 2.01 (0.96 to 3.38) | -0.57 (-0.75 to -0.39) |
| Kazakhstan | 92 (80 to 105) | 1.36 (1.18 to 1.54) | 34 (28 to 41) | 0.49 (0.41 to 0.59) | -0.63 (-0.72 to -0.51) | -4.14 (-4.58 to -3.7) |
| Kenya | 38 (27 to 51) | 0.43 (0.3 to 0.58) | 142 (110 to 187) | 0.66 (0.51 to 0.86) | 2.79 (1.73 to 4.31) | 1.68 (1.48 to 1.88) |
| Kiribati | 0 (0 to 0) | 0.25 (0.15 to 0.33) | 0 (0 to 0) | 0.31 (0.16 to 0.44) | 1.01 (0.33 to 1.97) | 0.51 (0.37 to 0.65) |
| Kuwait | 7 (6 to 8) | 0.88 (0.77 to 0.99) | 15 (13 to 18) | 0.71 (0.59 to 0.83) | 1.03 (0.66 to 1.53) | -1.2 (-1.9 to -0.49) |
| Kyrgyzstan | 9 (7 to 11) | 0.48 (0.37 to 0.59) | 12 (9 to 15) | 0.44 (0.34 to 0.57) | 0.39 (-0.03 to 1.02) | -0.83 (-1.19 to -0.47) |
| Lao People's Democratic Republic | 14 (10 to 21) | 0.94 (0.63 to 1.39) | 28 (18 to 44) | 0.89 (0.57 to 1.37) | 0.97 (0.28 to 1.99) | -0.33 (-0.38 to -0.27) |
| Latvia | 4 (4 to 5) | 0.44 (0.39 to 0.49) | 5 (4 to 5) | 0.86 (0.73 to 1.01) | 0.1 (-0.09 to 0.35) | 1.71 (1.29 to 2.14) |
| Lebanon | 19 (13 to 26) | 1.64 (1.17 to 2.26) | 27 (20 to 36) | 1.16 (0.86 to 1.53) | 0.42 (-0.09 to 1.12) | -0.86 (-1.07 to -0.66) |
| Lesotho | 3 (2 to 5) | 0.65 (0.43 to 0.92) | 15 (10 to 21) | 1.81 (1.15 to 2.53) | 3.33 (1.6 to 6.23) | 4.5 (3.96 to 5.05) |
| Liberia | 5 (3 to 6) | 0.51 (0.38 to 0.66) | 18 (12 to 24) | 0.81 (0.54 to 1.08) | 2.91 (1.51 to 5) | 2.08 (1.78 to 2.39) |
| Libya | 20 (14 to 29) | 1.18 (0.86 to 1.74) | 49 (35 to 76) | 1.64 (1.16 to 2.55) | 1.49 (0.64 to 2.89) | 1.54 (1.27 to 1.8) |
| Lithuania | 6 (6 to 7) | 0.45 (0.4 to 0.5) | 6 (5 to 7) | 0.78 (0.66 to 0.89) | 0 (-0.16 to 0.19) | 1.44 (1.01 to 1.87) |
| Luxembourg | 1 (1 to 1) | 0.94 (0.87 to 0.99) | 1 (1 to 1) | 0.38 (0.34 to 0.42) | -0.4 (-0.47 to -0.31) | -3.71 (-4.05 to -3.37) |
| Madagascar | 52 (38 to 64) | 1.14 (0.84 to 1.42) | 137 (94 to 194) | 1.17 (0.8 to 1.66) | 1.66 (0.79 to 2.88) | 0.06 (-0.08 to 0.2) |
| Malawi | 99 (73 to 131) | 2.65 (1.96 to 3.5) | 282 (180 to 404) | 3.44 (2.2 to 4.93) | 1.85 (0.82 to 3.52) | 0.83 (0.65 to 1.01) |
| Malaysia | 61 (49 to 82) | 0.83 (0.67 to 1.11) | 116 (89 to 155) | 0.83 (0.64 to 1.11) | 0.89 (0.34 to 1.49) | -0.35 (-0.56 to -0.14) |
| Maldives | 0 (0 to 1) | 0.6 (0.38 to 0.85) | 1 (1 to 1) | 0.41 (0.31 to 0.53) | 1.2 (0.41 to 2.57) | -1.3 (-1.55 to -1.06) |
| Mali | 9 (7 to 11) | 0.3 (0.23 to 0.37) | 26 (19 to 35) | 0.29 (0.21 to 0.4) | 1.95 (1.02 to 3.14) | 0.04 (-0.06 to 0.15) |
| Malta | 1 (1 to 1) | 0.67 (0.6 to 0.74) | 1 (1 to 1) | 0.53 (0.46 to 0.61) | -0.22 (-0.34 to -0.08) | -0.13 (-0.5 to 0.25) |
| Marshall Islands | 0 (0 to 0) | 0.8 (0.61 to 1.14) | 0 (0 to 0) | 1.17 (0.75 to 1.7) | 1.03 (0.32 to 2.15) | 1.5 (1.36 to 1.64) |
| Mauritania | 4 (3 to 5) | 0.46 (0.33 to 0.6) | 9 (6 to 12) | 0.5 (0.35 to 0.7) | 1.43 (0.6 to 2.6) | 0.14 (0.06 to 0.22) |
| Mauritius | 1 (1 to 1) | 0.25 (0.24 to 0.27) | 4 (3 to 4) | 0.83 (0.75 to 0.88) | 1.99 (1.67 to 2.3) | 2.52 (1.98 to 3.05) |
| Mexico | 231 (225 to 237) | 0.65 (0.63 to 0.66) | 404 (368 to 443) | 0.79 (0.72 to 0.86) | 0.75 (0.58 to 0.93) | 0.33 (0.09 to 0.56) |
| Micronesia (Federated States of) | 0 (0 to 1) | 0.92 (0.63 to 1.3) | 0 (0 to 1) | 1.16 (0.76 to 1.63) | 0.34 (-0.13 to 1.14) | 0.83 (0.76 to 0.91) |
| Monaco | 0 (0 to 0) | 1.02 (0.7 to 1.4) | 0 (0 to 0) | 0.99 (0.59 to 1.51) | -0.01 (-0.38 to 0.54) | -0.34 (-0.59 to -0.08) |
| Mongolia | 6 (4 to 8) | 0.7 (0.47 to 0.95) | 7 (6 to 10) | 0.58 (0.44 to 0.76) | 0.19 (-0.22 to 0.86) | -1.29 (-1.64 to -0.95) |
| Montenegro | 2 (1 to 2) | 0.6 (0.51 to 0.7) | 1 (1 to 1) | 0.45 (0.35 to 0.56) | -0.38 (-0.52 to -0.19) | -0.85 (-1.21 to -0.49) |
| Morocco | 67 (49 to 99) | 0.64 (0.47 to 0.95) | 82 (57 to 136) | 0.56 (0.39 to 0.93) | 0.23 (-0.21 to 1.01) | -0.57 (-0.72 to -0.41) |
| Mozambique | 13 (10 to 17) | 0.28 (0.22 to 0.36) | 52 (36 to 75) | 0.43 (0.3 to 0.62) | 2.95 (1.56 to 4.7) | 2.02 (1.83 to 2.21) |
| Myanmar | 178 (104 to 261) | 1.04 (0.61 to 1.52) | 183 (127 to 264) | 0.82 (0.56 to 1.17) | 0.03 (-0.32 to 0.62) | -1.12 (-1.27 to -0.97) |
| Namibia | 4 (3 to 6) | 0.76 (0.58 to 1.04) | 12 (8 to 20) | 1.19 (0.77 to 1.87) | 1.93 (0.84 to 3.69) | 1.35 (1.03 to 1.67) |
| Nauru | 0 (0 to 0) | 1.15 (0.81 to 1.61) | 0 (0 to 0) | 1.49 (0.95 to 2.12) | 0.49 (0 to 1.21) | 0.79 (0.67 to 0.91) |
| Nepal | 40 (28 to 57) | 0.54 (0.38 to 0.78) | 71 (48 to 113) | 0.53 (0.36 to 0.85) | 0.79 (0.1 to 1.8) | 0 (-0.19 to 0.19) |
| Netherlands | 35 (32 to 39) | 0.58 (0.53 to 0.64) | 20 (18 to 23) | 0.38 (0.34 to 0.43) | -0.42 (-0.5 to -0.33) | -1.71 (-2.04 to -1.38) |
| New Zealand | 12 (11 to 13) | 0.87 (0.8 to 0.95) | 10 (10 to 11) | 0.58 (0.53 to 0.63) | -0.14 (-0.24 to -0.02) | -1.84 (-2.3 to -1.38) |
| Nicaragua | 6 (5 to 8) | 0.42 (0.36 to 0.51) | 13 (11 to 17) | 0.47 (0.38 to 0.59) | 1.16 (0.72 to 1.74) | 0.44 (0.27 to 0.62) |
| Niger | 10 (7 to 14) | 0.36 (0.26 to 0.5) | 34 (20 to 54) | 0.38 (0.23 to 0.61) | 2.38 (1.23 to 3.96) | 0.13 (0.01 to 0.24) |
| Nigeria | 137 (101 to 180) | 0.4 (0.29 to 0.53) | 410 (282 to 605) | 0.46 (0.31 to 0.67) | 2 (1.01 to 3.41) | 0.33 (0.21 to 0.45) |
| Niue | 0 (0 to 0) | 0.7 (0.49 to 1.02) | 0 (0 to 0) | 1.25 (0.97 to 1.6) | 0.26 (-0.17 to 0.95) | 0.84 (0.51 to 1.16) |
| North Macedonia | 4 (3 to 5) | 0.49 (0.42 to 0.61) | 3 (2 to 4) | 0.37 (0.27 to 0.46) | -0.27 (-0.5 to -0.03) | -0.9 (-1.2 to -0.59) |
| Northern Mariana Islands | 0 (0 to 0) | 0.52 (0.34 to 0.81) | 0 (0 to 0) | 0.65 (0.51 to 0.83) | -0.12 (-0.45 to 0.4) | 1.09 (0.79 to 1.39) |
| Norway | 12 (12 to 13) | 0.77 (0.73 to 0.8) | 7 (6 to 7) | 0.37 (0.35 to 0.39) | -0.47 (-0.51 to -0.43) | -2.33 (-2.75 to -1.91) |
| Oman | 6 (4 to 9) | 0.68 (0.46 to 1.04) | 15 (11 to 21) | 0.64 (0.47 to 0.92) | 1.63 (0.52 to 3.1) | 0.61 (0.29 to 0.94) |
| Pakistan | 457 (379 to 548) | 1.12 (0.93 to 1.34) | 1612 (1197 to 2120) | 1.63 (1.21 to 2.14) | 2.53 (1.48 to 4.04) | 0.89 (0.59 to 1.19) |
| Palau | 0 (0 to 0) | 0.58 (0.41 to 0.82) | 0 (0 to 0) | 0.84 (0.61 to 1.11) | 0.22 (-0.21 to 0.87) | 1.26 (1.17 to 1.36) |
| Palestine | 6 (4 to 8) | 0.72 (0.49 to 1.01) | 14 (10 to 17) | 0.62 (0.47 to 0.77) | 1.43 (0.59 to 2.76) | -0.58 (-0.88 to -0.28) |
| Panama | 6 (6 to 7) | 0.63 (0.59 to 0.67) | 15 (12 to 17) | 0.89 (0.75 to 1.06) | 1.32 (0.93 to 1.77) | 1.11 (0.81 to 1.42) |
| Papua New Guinea | 8 (4 to 13) | 0.48 (0.25 to 0.81) | 25 (16 to 38) | 0.59 (0.36 to 0.9) | 2.18 (1.13 to 3.83) | 0.63 (0.53 to 0.73) |
| Paraguay | 7 (6 to 9) | 0.46 (0.38 to 0.56) | 18 (13 to 24) | 0.59 (0.44 to 0.78) | 1.47 (0.73 to 2.45) | 0.72 (0.49 to 0.95) |
| Peru | 107 (88 to 130) | 1.21 (0.99 to 1.46) | 157 (119 to 200) | 1.06 (0.8 to 1.35) | 0.46 (0.08 to 0.96) | -0.41 (-0.6 to -0.22) |
| Philippines | 245 (199 to 274) | 0.94 (0.77 to 1.06) | 413 (348 to 482) | 0.87 (0.74 to 1.02) | 0.69 (0.41 to 1.03) | -0.16 (-0.28 to -0.05) |
| Poland | 104 (101 to 108) | 0.72 (0.7 to 0.75) | 85 (78 to 91) | 0.7 (0.65 to 0.75) | -0.19 (-0.26 to -0.12) | -0.41 (-0.61 to -0.21) |
| Portugal | 38 (34 to 42) | 1 (0.9 to 1.1) | 17 (15 to 19) | 0.56 (0.5 to 0.64) | -0.56 (-0.62 to -0.49) | -2.44 (-2.81 to -2.06) |
| Puerto Rico | 31 (29 to 34) | 2.22 (2.04 to 2.4) | 16 (14 to 19) | 1.56 (1.32 to 1.86) | -0.48 (-0.57 to -0.38) | -1.57 (-1.93 to -1.21) |
| Qatar | 1 (1 to 2) | 0.59 (0.46 to 0.78) | 8 (6 to 10) | 0.48 (0.34 to 0.63) | 4.68 (2.77 to 7.06) | -0.62 (-1.05 to -0.2) |
| Republic of Korea | 172 (149 to 204) | 0.82 (0.71 to 0.97) | 67 (52 to 79) | 0.42 (0.33 to 0.49) | -0.61 (-0.71 to -0.52) | -2.72 (-2.94 to -2.5) |
| Republic of Moldova | 14 (14 to 16) | 0.83 (0.78 to 0.9) | 8 (7 to 9) | 0.66 (0.58 to 0.74) | -0.44 (-0.51 to -0.35) | -0.24 (-0.65 to 0.18) |
| Romania | 69 (64 to 75) | 0.79 (0.73 to 0.86) | 35 (30 to 40) | 0.64 (0.55 to 0.74) | -0.5 (-0.57 to -0.41) | -0.44 (-0.69 to -0.19) |
| Russian Federation | 484 (472 to 498) | 0.83 (0.81 to 0.86) | 360 (335 to 385) | 0.77 (0.72 to 0.83) | -0.26 (-0.31 to -0.2) | -0.69 (-0.88 to -0.49) |
| Rwanda | 58 (42 to 77) | 2.11 (1.52 to 2.81) | 80 (54 to 114) | 1.41 (0.96 to 2.02) | 0.38 (-0.18 to 1.18) | -2.16 (-2.54 to -1.78) |
| Saint Kitts and Nevis | 0 (0 to 0) | 2.08 (1.94 to 2.25) | 0 (0 to 0) | 0.96 (0.72 to 1.36) | -0.4 (-0.55 to -0.16) | -3.19 (-3.91 to -2.46) |
| Saint Lucia | 1 (1 to 1) | 2.35 (2.22 to 2.49) | 1 (1 to 2) | 2.11 (1.77 to 2.54) | 0.05 (-0.14 to 0.29) | -0.39 (-0.62 to -0.16) |
| Saint Vincent and the Grenadines | 1 (1 to 1) | 2.89 (2.65 to 3.13) | 1 (1 to 1) | 2.64 (2.28 to 3.06) | -0.18 (-0.3 to -0.04) | -0.51 (-0.67 to -0.35) |
| Samoa | 1 (0 to 1) | 0.95 (0.67 to 1.66) | 1 (1 to 1) | 1.06 (0.71 to 1.79) | 0.33 (-0.09 to 1.01) | 0.28 (0.17 to 0.39) |
| San Marino | 0 (0 to 0) | 1.35 (1.09 to 1.67) | 0 (0 to 0) | 0.81 (0.52 to 1.21) | -0.43 (-0.65 to -0.14) | -0.9 (-1.24 to -0.56) |
| Sao Tome and Principe | 0 (0 to 0) | 0.36 (0.22 to 0.61) | 1 (0 to 1) | 0.64 (0.39 to 1.06) | 2.8 (1.07 to 6.19) | 1.75 (1.23 to 2.27) |
| Saudi Arabia | 47 (34 to 65) | 0.71 (0.51 to 0.98) | 215 (147 to 306) | 1.16 (0.79 to 1.65) | 3.55 (1.7 to 6.34) | 1.88 (1.73 to 2.04) |
| Senegal | 13 (10 to 17) | 0.47 (0.35 to 0.61) | 41 (28 to 56) | 0.63 (0.44 to 0.86) | 2.1 (1.27 to 3.52) | 1.16 (0.97 to 1.35) |
| Serbia | 26 (22 to 32) | 0.73 (0.61 to 0.88) | 12 (10 to 15) | 0.41 (0.32 to 0.52) | -0.53 (-0.64 to -0.37) | -1.71 (-1.86 to -1.57) |
| Seychelles | 0 (0 to 1) | 1.26 (1.06 to 1.61) | 0 (0 to 1) | 1.29 (1.02 to 1.62) | 0.26 (-0.07 to 0.64) | 0.32 (-0.02 to 0.67) |
| Sierra Leone | 6 (4 to 9) | 0.39 (0.26 to 0.54) | 23 (15 to 33) | 0.61 (0.41 to 0.88) | 2.7 (1.53 to 4.81) | 1.75 (1.63 to 1.87) |
| Singapore | 11 (10 to 12) | 0.7 (0.64 to 0.76) | 9 (8 to 10) | 0.46 (0.4 to 0.52) | -0.16 (-0.28 to -0.03) | -2.06 (-2.37 to -1.75) |
| Slovakia | 16 (13 to 22) | 0.77 (0.64 to 1.07) | 11 (8 to 13) | 0.62 (0.49 to 0.77) | -0.32 (-0.52 to -0.1) | -0.4 (-0.51 to -0.28) |
| Slovenia | 6 (6 to 7) | 0.83 (0.74 to 0.92) | 4 (3 to 5) | 0.68 (0.56 to 0.81) | -0.39 (-0.5 to -0.26) | -0.66 (-0.99 to -0.33) |
| Solomon Islands | 1 (0 to 1) | 0.57 (0.29 to 0.96) | 3 (2 to 4) | 0.94 (0.62 to 1.34) | 2.48 (1.2 to 4.85) | 1.73 (1.61 to 1.85) |
| Somalia | 37 (25 to 54) | 1.29 (0.87 to 1.85) | 108 (71 to 155) | 1.31 (0.85 to 1.87) | 1.9 (0.94 to 3.28) | 0.13 (0.02 to 0.23) |
| South Africa | 242 (211 to 289) | 1.54 (1.34 to 1.84) | 414 (312 to 507) | 1.71 (1.29 to 2.09) | 0.71 (0.26 to 1.07) | 0.29 (-0.46 to 1.05) |
| South Sudan | 23 (15 to 33) | 0.98 (0.67 to 1.42) | 47 (30 to 68) | 1.31 (0.83 to 1.88) | 1.09 (0.42 to 2.14) | 0.85 (0.49 to 1.21) |
| Spain | 149 (138 to 160) | 1 (0.93 to 1.08) | 57 (52 to 63) | 0.46 (0.42 to 0.5) | -0.62 (-0.66 to -0.57) | -3.02 (-3.23 to -2.8) |
| Sri Lanka | 62 (50 to 82) | 0.84 (0.68 to 1.11) | 51 (35 to 71) | 0.63 (0.43 to 0.87) | -0.18 (-0.46 to 0.23) | -1.37 (-1.69 to -1.05) |
| Sudan | 49 (26 to 93) | 0.65 (0.34 to 1.22) | 126 (77 to 204) | 0.68 (0.42 to 1.1) | 1.57 (0.35 to 3.95) | 0.34 (0.21 to 0.46) |
| Suriname | 2 (2 to 3) | 1.49 (1.05 to 1.77) | 3 (2 to 4) | 1.44 (1.11 to 1.82) | 0.28 (-0.08 to 0.91) | -0.21 (-0.53 to 0.12) |
| Sweden | 20 (18 to 22) | 0.67 (0.62 to 0.74) | 11 (9 to 12) | 0.33 (0.29 to 0.37) | -0.46 (-0.54 to -0.37) | -1.71 (-1.98 to -1.44) |
| Switzerland | 22 (20 to 24) | 0.83 (0.75 to 0.91) | 10 (9 to 11) | 0.36 (0.32 to 0.4) | -0.54 (-0.61 to -0.47) | -3.3 (-3.5 to -3.09) |
| Syrian Arab Republic | 36 (24 to 48) | 0.76 (0.5 to 1) | 27 (19 to 36) | 0.53 (0.38 to 0.72) | -0.25 (-0.52 to 0.25) | -1.35 (-1.81 to -0.89) |
| Taiwan (Province of China) | 100 (93 to 106) | 1.08 (1.01 to 1.15) | 59 (54 to 65) | 0.79 (0.72 to 0.86) | -0.4 (-0.47 to -0.33) | -1.27 (-1.5 to -1.03) |
| Tajikistan | 24 (16 to 34) | 1.14 (0.78 to 1.61) | 42 (29 to 57) | 1 (0.7 to 1.37) | 0.73 (0.11 to 1.63) | -1.66 (-2.19 to -1.12) |
| Thailand | 201 (162 to 297) | 0.77 (0.62 to 1.15) | 260 (201 to 375) | 1.23 (0.95 to 1.77) | 0.29 (-0.03 to 0.75) | 0.08 (-0.59 to 0.76) |
| Timor-Leste | 2 (1 to 2) | 0.49 (0.33 to 0.72) | 3 (2 to 4) | 0.53 (0.37 to 0.73) | 0.92 (0.25 to 1.91) | 0.23 (-0.47 to 0.94) |
| Togo | 6 (5 to 8) | 0.46 (0.35 to 0.6) | 24 (16 to 33) | 0.71 (0.46 to 0.98) | 2.77 (1.44 to 4.68) | 1.5 (1.35 to 1.66) |
| Tokelau | 0 (0 to 0) | 0.67 (0.43 to 0.97) | 0 (0 to 0) | 1.29 (0.99 to 1.69) | 0.63 (0.09 to 1.52) | 1.12 (0.7 to 1.54) |
| Tonga | 0 (0 to 1) | 1.23 (0.95 to 1.58) | 1 (0 to 1) | 1.54 (1.05 to 2.26) | 0.32 (-0.15 to 1.14) | 0.69 (0.55 to 0.82) |
| Trinidad and Tobago | 8 (7 to 8) | 1.57 (1.48 to 1.66) | 9 (7 to 11) | 1.74 (1.32 to 2.26) | 0.1 (-0.18 to 0.42) | 0.25 (0.02 to 0.49) |
| Tunisia | 27 (20 to 38) | 0.78 (0.59 to 1.1) | 41 (28 to 60) | 0.93 (0.64 to 1.37) | 0.52 (0.01 to 1.2) | 0.44 (0.36 to 0.51) |
| T眉rkiye | 403 (301 to 519) | 1.68 (1.26 to 2.17) | 291 (223 to 363) | 0.91 (0.7 to 1.14) | -0.28 (-0.49 to 0) | -2.11 (-2.34 to -1.88) |
| Turkmenistan | 4 (4 to 5) | 0.27 (0.24 to 0.34) | 8 (6 to 11) | 0.41 (0.31 to 0.52) | 1.04 (0.45 to 1.78) | 1.14 (0.73 to 1.54) |
| Tuvalu | 0 (0 to 0) | 0.78 (0.54 to 1.09) | 0 (0 to 0) | 0.93 (0.67 to 1.26) | 0.64 (0.12 to 1.29) | 0.58 (0.55 to 0.61) |
| Uganda | 80 (56 to 109) | 1.24 (0.88 to 1.7) | 399 (268 to 545) | 2.32 (1.56 to 3.17) | 4 (2.08 to 7.21) | 1.38 (1.07 to 1.7) |
| Ukraine | 145 (125 to 185) | 0.76 (0.66 to 0.97) | 156 (112 to 203) | 1.13 (0.81 to 1.47) | 0.07 (-0.28 to 0.48) | 0.62 (0.35 to 0.89) |
| United Arab Emirates | 9 (6 to 13) | 0.93 (0.64 to 1.36) | 30 (22 to 40) | 0.76 (0.55 to 1) | 2.43 (1.04 to 4) | -0.6 (-0.83 to -0.37) |
| United Kingdom | 176 (174 to 178) | 0.84 (0.83 to 0.85) | 122 (120 to 125) | 0.56 (0.55 to 0.58) | -0.3 (-0.32 to -0.29) | -1.79 (-2.04 to -1.54) |
| United Republic of Tanzania | 121 (86 to 165) | 1.25 (0.89 to 1.7) | 303 (205 to 419) | 1.3 (0.88 to 1.8) | 1.51 (0.64 to 2.63) | 0.05 (0 to 0.1) |
| United States of America | 1302 (1277 to 1327) | 1.27 (1.25 to 1.3) | 521 (503 to 540) | 0.47 (0.45 to 0.49) | -0.6 (-0.62 to -0.58) | -3.91 (-4.22 to -3.6) |
| United States Virgin Islands | 1 (1 to 1) | 1.9 (1.52 to 2.37) | 1 (0 to 1) | 2.53 (1.87 to 3.44) | -0.22 (-0.45 to 0.11) | 1.45 (1.22 to 1.68) |
| Uruguay | 16 (15 to 17) | 1.41 (1.28 to 1.54) | 17 (15 to 19) | 1.42 (1.26 to 1.61) | 0.06 (-0.09 to 0.24) | -0.15 (-0.29 to -0.01) |
| Uzbekistan | 64 (53 to 76) | 0.75 (0.62 to 0.89) | 94 (76 to 116) | 0.68 (0.55 to 0.84) | 0.46 (0.08 to 1) | -0.74 (-1.03 to -0.44) |
| Vanuatu | 0 (0 to 1) | 0.58 (0.37 to 0.89) | 1 (1 to 1) | 0.87 (0.61 to 1.17) | 2.2 (1 to 4.15) | 1.2 (1.11 to 1.28) |
| Venezuela (Bolivarian Republic of) | 83 (79 to 87) | 1.03 (0.99 to 1.08) | 115 (84 to 149) | 1.22 (0.9 to 1.59) | 0.38 (-0.01 to 0.8) | 0.63 (0.31 to 0.96) |
| Viet Nam | 188 (138 to 262) | 0.66 (0.48 to 0.92) | 295 (210 to 427) | 0.77 (0.55 to 1.11) | 0.57 (0.06 to 1.33) | 0.5 (0.3 to 0.69) |
| Yemen | 17 (9 to 31) | 0.38 (0.2 to 0.68) | 56 (36 to 88) | 0.41 (0.26 to 0.64) | 2.23 (1.1 to 4.25) | 0.4 (0.19 to 0.62) |
| Zambia | 43 (32 to 56) | 1.43 (1.06 to 1.85) | 159 (82 to 323) | 1.97 (1.01 to 3.99) | 2.68 (0.86 to 6.41) | 0.86 (0.7 to 1.02) |
| Zimbabwe | 42 (32 to 53) | 1.05 (0.8 to 1.34) | 189 (126 to 259) | 2.99 (1.98 to 4.09) | 3.56 (1.94 to 5.69) | 4.39 (3.41 to 5.38) |
| **Location** | **DALYs cases in 1990** | **DALYs rate in 1990** | **DALYs cases in 2021** | **DALYs rate in 2021** | **Cases change** | **EAPC** |
| Afghanistan | 1774 (939 to 3408) | 56.33 (29.83 to 108.19) | 7310 (4381 to 12774) | 59.81 (35.85 to 104.52) | 3.12 (1.91 to 5.69) | 0.26 (0.15 to 0.36) |
| Albania | 287 (233 to 347) | 20.23 (16.37 to 24.46) | 137 (101 to 180) | 14.45 (10.61 to 18.95) | -0.52 (-0.65 to -0.31) | -1.21 (-1.73 to -0.69) |
| Algeria | 4424 (3436 to 6585) | 43.78 (34 to 65.17) | 6937 (5234 to 10036) | 40.74 (30.74 to 58.94) | 0.57 (0.14 to 1.11) | -0.41 (-0.51 to -0.3) |
| American Samoa | 8 (6 to 11) | 41.15 (31.65 to 55.92) | 12 (8 to 16) | 67.17 (47.59 to 89.56) | 0.41 (-0.12 to 1.17) | 1.98 (1.75 to 2.21) |
| Andorra | 24 (17 to 32) | 94.3 (67.68 to 129.15) | 15 (11 to 21) | 60.64 (41.4 to 81.68) | -0.34 (-0.58 to -0.01) | -1.21 (-1.49 to -0.93) |
| Angola | 1613 (1095 to 2254) | 41.23 (27.98 to 57.62) | 5430 (3339 to 8210) | 44.63 (27.44 to 67.48) | 2.37 (1.12 to 4.3) | 0.58 (0.36 to 0.8) |
| Antigua and Barbuda | 22 (20 to 24) | 85.8 (78.56 to 93.66) | 18 (16 to 20) | 51.87 (46.1 to 59.5) | -0.19 (-0.29 to -0.05) | -0.77 (-1.13 to -0.41) |
| Argentina | 10431 (9753 to 11150) | 85.39 (79.84 to 91.28) | 9242 (8389 to 10186) | 52.75 (47.88 to 58.13) | -0.11 (-0.22 to 0.01) | -1.27 (-1.43 to -1.1) |
| Armenia | 436 (376 to 496) | 30.3 (26.13 to 34.5) | 313 (254 to 372) | 29.09 (23.63 to 34.58) | -0.28 (-0.44 to -0.06) | -0.15 (-0.81 to 0.51) |
| Australia | 4166 (3864 to 4479) | 61.52 (57.05 to 66.14) | 2671 (2388 to 2949) | 30.81 (27.54 to 34.02) | -0.36 (-0.43 to -0.27) | -2.72 (-2.9 to -2.53) |
| Austria | 1351 (1265 to 1445) | 45.01 (42.14 to 48.14) | 892 (818 to 980) | 31.6 (29 to 34.73) | -0.34 (-0.41 to -0.26) | -1.58 (-1.81 to -1.34) |
| Azerbaijan | 1052 (693 to 1563) | 33.09 (21.81 to 49.18) | 1048 (648 to 1607) | 24.75 (15.29 to 37.94) | 0 (-0.45 to 0.96) | -1.99 (-2.57 to -1.4) |
| Bahamas | 139 (127 to 152) | 118.1 (107.73 to 129.16) | 188 (147 to 236) | 121.23 (95.16 to 152.63) | 0.35 (0.06 to 0.76) | -0.03 (-0.18 to 0.13) |
| Bahrain | 147 (113 to 182) | 57.21 (44.27 to 71.15) | 317 (248 to 390) | 45.01 (35.28 to 55.48) | 1.16 (0.53 to 1.92) | -1.12 (-1.43 to -0.82) |
| Bangladesh | 15880 (11808 to 19993) | 37.62 (27.97 to 47.37) | 19119 (12534 to 31556) | 27.78 (18.21 to 45.86) | 0.2 (-0.25 to 0.85) | -1.11 (-1.31 to -0.91) |
| Barbados | 173 (162 to 185) | 158.44 (148.14 to 169.51) | 121 (96 to 155) | 122.46 (96.91 to 157.02) | -0.3 (-0.46 to -0.1) | -1.14 (-1.36 to -0.92) |
| Belarus | 902 (780 to 1033) | 22.87 (19.76 to 26.19) | 1425 (1147 to 1746) | 48.57 (39.11 to 59.51) | 0.58 (0.22 to 1) | 2.13 (1.75 to 2.51) |
| Belgium | 1884 (1725 to 2067) | 50.62 (46.36 to 55.55) | 1262 (1120 to 1438) | 36.04 (31.97 to 41.07) | -0.33 (-0.42 to -0.23) | -1.68 (-1.94 to -1.43) |
| Belize | 27 (25 to 29) | 36.92 (34.26 to 40.05) | 82 (73 to 91) | 43.41 (38.93 to 48.43) | 2.03 (1.66 to 2.46) | 0.58 (0.24 to 0.93) |
| Benin | 457 (340 to 597) | 26.84 (19.96 to 35.03) | 1885 (1252 to 2664) | 35.96 (23.87 to 50.81) | 3.12 (1.69 to 4.9) | 0.83 (0.69 to 0.97) |
| Bermuda | 37 (33 to 41) | 142.76 (127.62 to 158.39) | 13 (10 to 16) | 72.97 (59.4 to 89.38) | -0.65 (-0.72 to -0.56) | -2 (-2.34 to -1.66) |
| Bhutan | 105 (70 to 152) | 38.81 (25.83 to 56.56) | 109 (67 to 186) | 31.41 (19.25 to 53.54) | 0.04 (-0.45 to 0.83) | -0.98 (-1.08 to -0.89) |
| Bolivia (Plurinational State of) | 2009 (1502 to 2587) | 81.46 (60.93 to 104.89) | 3402 (2348 to 4856) | 69.23 (47.77 to 98.82) | 0.69 (0.08 to 1.6) | -0.8 (-0.92 to -0.67) |
| Bosnia and Herzegovina | 563 (486 to 673) | 29.64 (25.59 to 35.44) | 295 (198 to 383) | 29.28 (19.64 to 38.04) | -0.48 (-0.66 to -0.31) | 0.09 (-0.16 to 0.35) |
| Botswana | 308 (197 to 456) | 59.78 (38.3 to 88.65) | 714 (462 to 1064) | 66.99 (43.36 to 99.89) | 1.32 (0.47 to 2.76) | 0.42 (0.16 to 0.68) |
| Brazil | 32177 (31085 to 33245) | 51.28 (49.54 to 52.98) | 42922 (41144 to 44849) | 50.35 (48.26 to 52.61) | 0.33 (0.26 to 0.41) | -0.36 (-0.55 to -0.18) |
| Brunei Darussalam | 126 (100 to 160) | 101.86 (81.08 to 129.47) | 146 (118 to 178) | 71.78 (57.65 to 87.36) | 0.17 (-0.12 to 0.6) | -1.06 (-1.42 to -0.69) |
| Bulgaria | 1301 (1200 to 1413) | 43.7 (40.32 to 47.45) | 936 (781 to 1116) | 49.27 (41.12 to 58.76) | -0.28 (-0.41 to -0.13) | 0.65 (0.37 to 0.93) |
| Burkina Faso | 878 (606 to 1197) | 27.53 (19 to 37.56) | 3361 (2292 to 4707) | 38.84 (26.48 to 54.39) | 2.83 (1.59 to 4.67) | 1.3 (1.16 to 1.45) |
| Burundi | 2188 (1449 to 3194) | 105.54 (69.89 to 154.09) | 4198 (2914 to 6107) | 79.63 (55.28 to 115.84) | 0.92 (0.27 to 2.06) | -1.34 (-1.59 to -1.08) |
| Cabo Verde | 20 (15 to 33) | 15.42 (11.79 to 25.34) | 122 (57 to 177) | 48.78 (22.81 to 70.64) | 5.06 (0.89 to 8.69) | 2.9 (1.72 to 4.09) |
| Cambodia | 2043 (1487 to 2946) | 53.06 (38.61 to 76.52) | 4404 (3029 to 6429) | 60.8 (41.82 to 88.76) | 1.16 (0.32 to 2.43) | 0.2 (0.1 to 0.31) |
| Cameroon | 1457 (1092 to 1855) | 38.3 (28.72 to 48.77) | 7291 (4809 to 10123) | 56.55 (37.3 to 78.52) | 4.01 (2.2 to 6.62) | 1.23 (1.1 to 1.37) |
| Canada | 7485 (6906 to 8136) | 67.33 (62.12 to 73.19) | 4506 (3937 to 5145) | 37.99 (33.19 to 43.37) | -0.4 (-0.48 to -0.31) | -2.64 (-3.03 to -2.25) |
| Central African Republic | 549 (396 to 759) | 52.68 (38.02 to 72.9) | 1227 (798 to 1725) | 56.21 (36.55 to 79.02) | 1.24 (0.53 to 2.15) | 0.14 (0.05 to 0.22) |
| Chad | 438 (304 to 617) | 20.88 (14.5 to 29.4) | 2053 (1371 to 2953) | 32.62 (21.79 to 46.93) | 3.68 (2.13 to 5.93) | 1.57 (1.33 to 1.8) |
| Chile | 3520 (3253 to 3787) | 61.45 (56.81 to 66.12) | 3128 (2847 to 3429) | 44.21 (40.24 to 48.46) | -0.11 (-0.2 to 0.01) | -1.18 (-1.4 to -0.96) |
| China | 245657 (206605 to 289294) | 44.82 (37.69 to 52.78) | 177442 (139926 to 214742) | 38.45 (30.32 to 46.54) | -0.28 (-0.45 to -0.07) | -0.64 (-0.94 to -0.34) |
| Colombia | 9341 (8700 to 9993) | 66.46 (61.9 to 71.11) | 10657 (9000 to 12465) | 53.03 (44.79 to 62.03) | 0.14 (-0.04 to 0.35) | -0.7 (-0.89 to -0.5) |
| Comoros | 140 (52 to 212) | 80.97 (30.02 to 122.46) | 285 (188 to 407) | 91.99 (60.62 to 131.35) | 1.04 (0.17 to 4.95) | -0.43 (-1.16 to 0.31) |
| Congo | 529 (380 to 763) | 55.88 (40.13 to 80.57) | 1367 (919 to 2007) | 61.72 (41.49 to 90.57) | 1.58 (0.72 to 3.09) | 0.21 (-0.01 to 0.43) |
| Cook Islands | 2 (1 to 2) | 23.55 (17.15 to 31.79) | 2 (1 to 2) | 28.56 (19.8 to 41.26) | -0.07 (-0.43 to 0.52) | 1.22 (0.86 to 1.59) |
| Costa Rica | 755 (688 to 828) | 58.77 (53.58 to 64.48) | 1452 (1295 to 1634) | 76.29 (68.04 to 85.87) | 0.92 (0.66 to 1.24) | 0.48 (0.24 to 0.71) |
| C么te d'Ivoire | 2162 (1630 to 2888) | 45.71 (34.46 to 61.05) | 6633 (4601 to 9070) | 59.16 (41.03 to 80.9) | 2.07 (1.04 to 3.44) | 0.88 (0.73 to 1.03) |
| Croatia | 907 (794 to 1031) | 49.99 (43.77 to 56.8) | 536 (440 to 645) | 42.95 (35.23 to 51.69) | -0.41 (-0.52 to -0.28) | -0.51 (-0.94 to -0.07) |
| Cuba | 5049 (4620 to 5450) | 103.47 (94.68 to 111.7) | 2295 (1984 to 2633) | 64.01 (55.33 to 73.44) | -0.55 (-0.62 to -0.46) | -1.83 (-2.25 to -1.42) |
| Cyprus | 120 (98 to 157) | 39 (31.99 to 50.99) | 149 (115 to 189) | 29.77 (22.86 to 37.68) | 0.25 (-0.06 to 0.62) | -1.19 (-1.71 to -0.67) |
| Czechia | 1764 (1615 to 1950) | 47.53 (43.53 to 52.54) | 1315 (1071 to 1590) | 44.54 (36.28 to 53.85) | -0.25 (-0.41 to -0.08) | 0.46 (0.12 to 0.8) |
| Democratic People's Republic of Korea | 3975 (2627 to 5818) | 47.66 (31.5 to 69.75) | 5229 (3540 to 7810) | 51.99 (35.2 to 77.64) | 0.32 (-0.18 to 0.99) | 0.17 (0.12 to 0.23) |
| Democratic Republic of the Congo | 5111 (3456 to 7194) | 35.68 (24.13 to 50.22) | 14330 (10052 to 20637) | 39.71 (27.86 to 57.19) | 1.8 (0.97 to 2.96) | 0.38 (0.15 to 0.6) |
| Denmark | 673 (618 to 738) | 35.25 (32.4 to 38.7) | 400 (357 to 443) | 21.95 (19.56 to 24.32) | -0.4 (-0.48 to -0.33) | -1.91 (-2.22 to -1.61) |
| Djibouti | 98 (62 to 142) | 55.7 (35.23 to 80.84) | 390 (231 to 598) | 72.03 (42.66 to 110.64) | 2.99 (1.47 to 5.59) | 0.77 (0.45 to 1.09) |
| Dominica | 33 (27 to 39) | 112.79 (92.93 to 134.98) | 34 (25 to 46) | 132.78 (96.8 to 177.38) | 0.04 (-0.28 to 0.44) | 0.8 (0.54 to 1.07) |
| Dominican Republic | 1361 (1129 to 1615) | 44.31 (36.74 to 52.57) | 2501 (1834 to 3214) | 55 (40.34 to 70.67) | 0.84 (0.38 to 1.38) | 1.54 (1.18 to 1.91) |
| Ecuador | 2423 (2229 to 2637) | 58.72 (54.01 to 63.9) | 5198 (4123 to 6574) | 71.16 (56.45 to 90.01) | 1.15 (0.7 to 1.71) | 0.81 (0.32 to 1.29) |
| Egypt | 8810 (7376 to 10932) | 40.19 (33.65 to 49.86) | 11362 (8519 to 18726) | 26.92 (20.18 to 44.36) | 0.29 (-0.07 to 0.92) | -1.45 (-1.64 to -1.25) |
| El Salvador | 741 (660 to 886) | 35.45 (31.59 to 42.38) | 1145 (864 to 1448) | 44.17 (33.34 to 55.87) | 0.55 (0.14 to 1.01) | 0.96 (0.67 to 1.24) |
| Equatorial Guinea | 70 (46 to 104) | 46.5 (30.77 to 68.73) | 367 (214 to 615) | 52.8 (30.7 to 88.45) | 4.23 (2.02 to 8.18) | 0.44 (0.16 to 0.73) |
| Eritrea | 1077 (770 to 1420) | 83.09 (59.39 to 109.56) | 2569 (1645 to 3742) | 91.75 (58.76 to 133.63) | 1.39 (0.48 to 2.51) | 0.22 (0.09 to 0.35) |
| Estonia | 226 (193 to 264) | 39.71 (34 to 46.45) | 217 (182 to 256) | 54.82 (45.91 to 64.82) | -0.04 (-0.23 to 0.21) | 0.09 (-0.38 to 0.57) |
| Eswatini | 196 (139 to 278) | 65.16 (46.25 to 92.25) | 686 (378 to 1021) | 134.74 (74.22 to 200.5) | 2.49 (0.99 to 4.63) | 2.7 (2.01 to 3.39) |
| Ethiopia | 17431 (11552 to 24633) | 95.41 (63.23 to 134.83) | 29552 (21441 to 39974) | 63.75 (46.25 to 86.23) | 0.7 (0.25 to 1.84) | -1.71 (-1.91 to -1.51) |
| Fiji | 111 (86 to 147) | 34.37 (26.71 to 45.54) | 169 (117 to 230) | 47.32 (32.8 to 64.43) | 0.52 (0 to 1.29) | 1.6 (1.32 to 1.88) |
| Finland | 1142 (1053 to 1240) | 62.89 (57.99 to 68.3) | 755 (671 to 848) | 45.3 (40.3 to 50.89) | -0.34 (-0.42 to -0.25) | -0.84 (-0.96 to -0.73) |
| France | 13323 (12199 to 14483) | 60.56 (55.45 to 65.83) | 6986 (6179 to 7882) | 35.16 (31.1 to 39.68) | -0.48 (-0.54 to -0.4) | -2.07 (-2.22 to -1.91) |
| Gabon | 207 (151 to 283) | 53.72 (39.21 to 73.48) | 454 (287 to 687) | 60.51 (38.28 to 91.61) | 1.2 (0.34 to 2.51) | 0.22 (0.08 to 0.36) |
| Gambia | 125 (89 to 165) | 33.12 (23.69 to 43.67) | 514 (342 to 753) | 51.35 (34.17 to 75.25) | 3.11 (1.67 to 5.09) | 1.09 (0.79 to 1.39) |
| Georgia | 1444 (1099 to 1844) | 67.8 (51.61 to 86.62) | 600 (453 to 762) | 52.9 (39.95 to 67.17) | -0.58 (-0.72 to -0.39) | -1.48 (-2.08 to -0.88) |
| Germany | 13608 (12661 to 14660) | 45.81 (42.62 to 49.35) | 6095 (5513 to 6757) | 24.09 (21.79 to 26.71) | -0.55 (-0.6 to -0.49) | -2.48 (-2.74 to -2.22) |
| Ghana | 4413 (1933 to 6257) | 76.88 (33.68 to 109) | 5727 (3944 to 7956) | 40.05 (27.58 to 55.63) | 0.3 (-0.25 to 2.14) | -3.37 (-4.16 to -2.56) |
| Greece | 1002 (938 to 1067) | 26.66 (24.96 to 28.38) | 755 (697 to 819) | 27.12 (25.03 to 29.43) | -0.25 (-0.33 to -0.17) | -0.21 (-0.43 to 0.01) |
| Greenland | 23 (18 to 29) | 87.08 (66.17 to 110.35) | 8 (5 to 12) | 38.02 (25.21 to 58.01) | -0.66 (-0.78 to -0.48) | -3.09 (-3.36 to -2.82) |
| Grenada | 94 (83 to 107) | 283.4 (249.64 to 321.72) | 81 (69 to 96) | 200.85 (170.29 to 236.78) | -0.14 (-0.3 to 0.07) | -0.99 (-1.19 to -0.79) |
| Guam | 44 (35 to 50) | 68.63 (55.68 to 78.48) | 42 (36 to 49) | 74.87 (64.54 to 88.88) | -0.05 (-0.2 to 0.15) | 0.95 (0.46 to 1.45) |
| Guatemala | 792 (754 to 834) | 26.81 (25.51 to 28.24) | 1822 (1581 to 2074) | 26.77 (23.23 to 30.48) | 1.3 (0.99 to 1.66) | 0.11 (-0.19 to 0.42) |
| Guinea | 509 (367 to 677) | 24.76 (17.85 to 32.98) | 1663 (1130 to 2422) | 32.18 (21.86 to 46.87) | 2.27 (1.1 to 4.18) | 0.91 (0.85 to 0.98) |
| Guinea-Bissau | 184 (132 to 246) | 49.74 (35.71 to 66.47) | 539 (381 to 734) | 63.92 (45.14 to 86.97) | 1.92 (1.03 to 3.41) | 0.89 (0.8 to 0.98) |
| Guyana | 183 (149 to 213) | 53.87 (43.77 to 62.65) | 213 (162 to 273) | 68.63 (52.08 to 87.83) | 0.16 (-0.14 to 0.53) | 0.94 (0.69 to 1.19) |
| Haiti | 2682 (1767 to 4184) | 110.16 (72.59 to 171.87) | 5399 (3376 to 8257) | 98.35 (61.5 to 150.41) | 1.01 (0.35 to 2.02) | -0.06 (-0.24 to 0.13) |
| Honduras | 404 (317 to 497) | 23.39 (18.35 to 28.76) | 772 (382 to 1325) | 17.56 (8.7 to 30.14) | 0.91 (-0.04 to 2.45) | -1.42 (-1.74 to -1.09) |
| Hungary | 2217 (1977 to 2471) | 59.98 (53.49 to 66.85) | 1270 (1083 to 1458) | 46.17 (39.35 to 52.98) | -0.43 (-0.53 to -0.31) | -1.16 (-1.43 to -0.88) |
| Iceland | 39 (35 to 43) | 37.56 (33.89 to 41.65) | 64 (54 to 77) | 53.16 (45.15 to 64.58) | 0.63 (0.36 to 1) | 1.35 (1.03 to 1.68) |
| India | 122838 (100854 to 147431) | 36.02 (29.57 to 43.23) | 185613 (161010 to 222198) | 30.46 (26.42 to 36.46) | 0.51 (0.2 to 0.88) | -0.7 (-0.89 to -0.51) |
| Indonesia | 34778 (26015 to 45786) | 44.56 (33.33 to 58.67) | 50490 (38016 to 70168) | 44.34 (33.38 to 61.62) | 0.45 (0.08 to 0.96) | -0.04 (-0.19 to 0.12) |
| Iran (Islamic Republic of) | 6822 (5404 to 8563) | 31.41 (24.88 to 39.43) | 13631 (10794 to 15197) | 39.28 (31.1 to 43.79) | 1 (0.43 to 1.58) | 1.01 (0.85 to 1.17) |
| Iraq | 4245 (3111 to 5526) | 59.08 (43.3 to 76.91) | 7790 (5693 to 11180) | 44.68 (32.65 to 64.12) | 0.84 (0.22 to 1.9) | -0.91 (-1.1 to -0.71) |
| Ireland | 672 (620 to 739) | 48.99 (45.18 to 53.85) | 537 (472 to 607) | 34.3 (30.19 to 38.78) | -0.2 (-0.32 to -0.08) | -0.99 (-1.32 to -0.66) |
| Israel | 1112 (1029 to 1219) | 58.18 (53.85 to 63.79) | 1408 (1263 to 1591) | 42.38 (38.01 to 47.87) | 0.27 (0.11 to 0.45) | -1.43 (-1.9 to -0.97) |
| Italy | 15825 (15134 to 16504) | 74.13 (70.89 to 77.31) | 6310 (5887 to 6833) | 39.95 (37.27 to 43.26) | -0.6 (-0.63 to -0.57) | -2.44 (-2.76 to -2.12) |
| Jamaica | 684 (623 to 755) | 69.58 (63.39 to 76.82) | 1127 (848 to 1530) | 94.41 (71.05 to 128.26) | 0.65 (0.2 to 1.31) | -0.03 (-0.71 to 0.66) |
| Japan | 19583 (19234 to 19939) | 43.7 (42.92 to 44.49) | 7751 (7527 to 8000) | 23.91 (23.22 to 24.68) | -0.6 (-0.62 to -0.59) | -2.06 (-2.19 to -1.93) |
| Jordan | 1134 (846 to 1518) | 73.77 (55.05 to 98.74) | 3391 (2500 to 4385) | 63.17 (46.58 to 81.68) | 1.99 (0.93 to 3.38) | -0.59 (-0.76 to -0.42) |
| Kazakhstan | 5759 (5023 to 6562) | 84.83 (73.99 to 96.65) | 2114 (1739 to 2551) | 30.34 (24.95 to 36.61) | -0.63 (-0.72 to -0.52) | -4.18 (-4.62 to -3.73) |
| Kenya | 2390 (1684 to 3236) | 27.29 (19.23 to 36.95) | 8917 (6883 to 11723) | 41.18 (31.79 to 54.15) | 2.73 (1.69 to 4.22) | 1.63 (1.43 to 1.82) |
| Kiribati | 5 (3 to 6) | 15.65 (9.29 to 20.52) | 10 (5 to 14) | 19.12 (10.04 to 27.42) | 0.99 (0.33 to 1.94) | 0.51 (0.37 to 0.65) |
| Kuwait | 469 (407 to 531) | 55.44 (48.22 to 62.83) | 953 (793 to 1118) | 44.87 (37.37 to 52.68) | 1.03 (0.66 to 1.51) | -1.15 (-1.85 to -0.44) |
| Kyrgyzstan | 532 (410 to 654) | 29.48 (22.72 to 36.25) | 748 (569 to 959) | 27.47 (20.92 to 35.24) | 0.41 (-0.02 to 1.04) | -0.8 (-1.17 to -0.43) |
| Lao People's Democratic Republic | 918 (619 to 1364) | 59.44 (40.04 to 88.26) | 1786 (1152 to 2773) | 55.67 (35.91 to 86.46) | 0.94 (0.27 to 1.95) | -0.34 (-0.4 to -0.29) |
| Latvia | 257 (229 to 287) | 26.99 (24.02 to 30.09) | 281 (238 to 330) | 52.25 (44.23 to 61.34) | 0.09 (-0.1 to 0.34) | 1.76 (1.34 to 2.19) |
| Lebanon | 1177 (837 to 1635) | 102.14 (72.58 to 141.85) | 1696 (1267 to 2234) | 73.08 (54.62 to 96.26) | 0.44 (-0.08 to 1.16) | -0.79 (-1 to -0.57) |
| Lesotho | 214 (144 to 305) | 39.69 (26.63 to 56.49) | 915 (588 to 1264) | 109.99 (70.63 to 152) | 3.27 (1.58 to 6.08) | 4.45 (3.9 to 5) |
| Liberia | 292 (218 to 384) | 31.65 (23.63 to 41.6) | 1139 (759 to 1534) | 50.74 (33.79 to 68.33) | 2.9 (1.53 to 5.02) | 2.08 (1.79 to 2.36) |
| Libya | 1256 (912 to 1863) | 74.76 (54.28 to 110.85) | 3052 (2165 to 4712) | 101.73 (72.16 to 157.04) | 1.43 (0.61 to 2.8) | 1.44 (1.17 to 1.71) |
| Lithuania | 386 (344 to 432) | 27.72 (24.72 to 31.02) | 392 (334 to 448) | 48.65 (41.53 to 55.71) | 0.01 (-0.16 to 0.2) | 1.49 (1.06 to 1.92) |
| Luxembourg | 87 (81 to 93) | 59.12 (55.03 to 62.87) | 57 (50 to 63) | 25.62 (22.88 to 28.73) | -0.35 (-0.43 to -0.26) | -3.46 (-3.79 to -3.12) |
| Madagascar | 3277 (2405 to 4096) | 72.34 (53.1 to 90.43) | 8686 (5949 to 12302) | 74.17 (50.8 to 105.05) | 1.65 (0.77 to 2.85) | 0.05 (-0.09 to 0.2) |
| Malawi | 6313 (4650 to 8359) | 168.95 (124.46 to 223.72) | 17932 (11409 to 25984) | 219.13 (139.42 to 317.52) | 1.84 (0.79 to 3.58) | 0.81 (0.63 to 0.98) |
| Malaysia | 3853 (3089 to 5171) | 51.91 (41.62 to 69.68) | 7195 (5565 to 9678) | 51.75 (40.03 to 69.61) | 0.87 (0.31 to 1.47) | -0.37 (-0.58 to -0.16) |
| Maldives | 31 (20 to 44) | 38.28 (24.6 to 53.76) | 66 (50 to 83) | 25.27 (19.17 to 32.03) | 1.11 (0.37 to 2.38) | -1.37 (-1.61 to -1.13) |
| Mali | 559 (437 to 700) | 18.72 (14.64 to 23.45) | 1667 (1195 to 2240) | 18.71 (13.42 to 25.15) | 1.98 (1.02 to 3.19) | 0.08 (-0.03 to 0.18) |
| Malta | 63 (56 to 71) | 45.48 (40.81 to 51.36) | 51 (44 to 60) | 38.32 (32.84 to 44.6) | -0.18 (-0.31 to -0.04) | -0.03 (-0.39 to 0.33) |
| Marshall Islands | 9 (7 to 12) | 50.28 (38.82 to 71.42) | 17 (11 to 25) | 72.06 (46.13 to 104.69) | 0.98 (0.28 to 2.09) | 1.42 (1.28 to 1.57) |
| Mauritania | 221 (158 to 290) | 28.8 (20.51 to 37.72) | 540 (371 to 758) | 31.63 (21.75 to 44.42) | 1.44 (0.61 to 2.67) | 0.15 (0.07 to 0.23) |
| Mauritius | 78 (73 to 83) | 15.65 (14.71 to 16.64) | 233 (211 to 248) | 51.2 (46.32 to 54.46) | 2 (1.67 to 2.3) | 2.53 (1.99 to 3.07) |
| Mexico | 14644 (14281 to 15052) | 41.06 (40.04 to 42.21) | 25291 (23056 to 27622) | 49.1 (44.76 to 53.62) | 0.73 (0.56 to 0.9) | 0.29 (0.05 to 0.52) |
| Micronesia (Federated States of) | 23 (16 to 32) | 56.9 (39.29 to 80.73) | 31 (20 to 43) | 72.04 (47.29 to 101.54) | 0.34 (-0.12 to 1.15) | 0.84 (0.76 to 0.92) |
| Monaco | 6 (4 to 8) | 65.62 (45.57 to 90.42) | 6 (4 to 10) | 67.33 (40.69 to 102.28) | 0.05 (-0.34 to 0.6) | -0.14 (-0.39 to 0.1) |
| Mongolia | 391 (267 to 536) | 44.22 (30.24 to 60.67) | 447 (337 to 590) | 35.4 (26.71 to 46.77) | 0.14 (-0.25 to 0.78) | -1.38 (-1.73 to -1.03) |
| Montenegro | 95 (81 to 109) | 37.74 (32.24 to 43.53) | 59 (46 to 76) | 28.9 (22.47 to 36.86) | -0.37 (-0.51 to -0.17) | -0.76 (-1.14 to -0.39) |
| Morocco | 4171 (3041 to 6210) | 40.12 (29.25 to 59.73) | 5092 (3501 to 8431) | 34.68 (23.84 to 57.42) | 0.22 (-0.22 to 1) | -0.58 (-0.74 to -0.42) |
| Mozambique | 816 (631 to 1058) | 17.21 (13.31 to 22.3) | 3236 (2194 to 4632) | 26.91 (18.25 to 38.52) | 2.97 (1.57 to 4.72) | 2.01 (1.83 to 2.2) |
| Myanmar | 11336 (6614 to 16488) | 66.03 (38.53 to 96.04) | 11582 (7973 to 16711) | 51.52 (35.47 to 74.33) | 0.02 (-0.33 to 0.62) | -1.15 (-1.3 to -1) |
| Namibia | 267 (204 to 364) | 47.8 (36.49 to 65.01) | 767 (499 to 1213) | 73.37 (47.73 to 116.07) | 1.87 (0.79 to 3.58) | 1.28 (0.97 to 1.6) |
| Nauru | 3 (2 to 4) | 70.99 (50.12 to 98.8) | 4 (3 to 6) | 92.54 (59.32 to 131.44) | 0.5 (0.01 to 1.22) | 0.82 (0.7 to 0.93) |
| Nepal | 2492 (1741 to 3599) | 34.11 (23.83 to 49.26) | 4478 (3016 to 7103) | 33.4 (22.49 to 52.98) | 0.8 (0.1 to 1.8) | 0.02 (-0.17 to 0.21) |
| Netherlands | 2223 (2014 to 2453) | 36.87 (33.4 to 40.68) | 1379 (1217 to 1583) | 26.11 (23.05 to 29.98) | -0.38 (-0.47 to -0.28) | -1.44 (-1.75 to -1.13) |
| New Zealand | 769 (702 to 838) | 55.65 (50.81 to 60.68) | 701 (633 to 766) | 38.9 (35.13 to 42.5) | -0.09 (-0.21 to 0.03) | -1.62 (-2.08 to -1.14) |
| Nicaragua | 393 (333 to 476) | 26.65 (22.54 to 32.23) | 833 (672 to 1040) | 29.28 (23.63 to 36.53) | 1.12 (0.7 to 1.68) | 0.38 (0.2 to 0.56) |
| Niger | 639 (453 to 889) | 22.95 (16.28 to 31.92) | 2164 (1278 to 3433) | 24.26 (14.34 to 38.49) | 2.39 (1.23 to 3.95) | 0.14 (0.03 to 0.25) |
| Nigeria | 8557 (6297 to 11325) | 25.06 (18.44 to 33.17) | 25872 (17665 to 38464) | 28.77 (19.64 to 42.77) | 2.02 (1.02 to 3.44) | 0.35 (0.23 to 0.47) |
| Niue | 0 (0 to 1) | 43.62 (30.95 to 63.56) | 0 (0 to 1) | 81.11 (63.2 to 103.68) | 0.31 (-0.14 to 1.02) | 0.9 (0.56 to 1.24) |
| North Macedonia | 241 (206 to 302) | 30.38 (25.95 to 37.98) | 179 (131 to 223) | 23.35 (17.16 to 29.1) | -0.26 (-0.5 to -0.02) | -0.85 (-1.17 to -0.53) |
| Northern Mariana Islands | 8 (5 to 12) | 32.24 (20.95 to 49.33) | 7 (5 to 9) | 41.12 (31.83 to 52.55) | -0.1 (-0.43 to 0.42) | 1.14 (0.87 to 1.42) |
| Norway | 778 (738 to 814) | 48.61 (46.14 to 50.87) | 453 (418 to 494) | 25.5 (23.56 to 27.84) | -0.42 (-0.47 to -0.36) | -2.02 (-2.46 to -1.58) |
| Oman | 352 (238 to 539) | 42.36 (28.71 to 65.01) | 925 (685 to 1313) | 39.96 (29.6 to 56.72) | 1.63 (0.54 to 3.07) | 0.65 (0.31 to 1) |
| Pakistan | 28874 (23925 to 34575) | 70.76 (58.63 to 84.73) | 101112 (74681 to 132541) | 102.23 (75.51 to 134.01) | 2.5 (1.47 to 4.03) | 0.87 (0.56 to 1.18) |
| Palau | 3 (2 to 4) | 36.32 (25.48 to 51.29) | 3 (2 to 4) | 52.08 (38.49 to 68.11) | 0.21 (-0.21 to 0.84) | 1.24 (1.16 to 1.33) |
| Palestine | 358 (241 to 496) | 46.65 (31.42 to 64.59) | 868 (662 to 1075) | 39.76 (30.3 to 49.23) | 1.42 (0.6 to 2.75) | -0.57 (-0.88 to -0.25) |
| Panama | 403 (378 to 430) | 39.79 (37.33 to 42.46) | 932 (781 to 1103) | 56.48 (47.31 to 66.85) | 1.32 (0.92 to 1.76) | 1.12 (0.82 to 1.43) |
| Papua New Guinea | 503 (256 to 846) | 30.38 (15.45 to 51.11) | 1603 (975 to 2431) | 37.45 (22.77 to 56.81) | 2.19 (1.12 to 3.84) | 0.63 (0.53 to 0.73) |
| Paraguay | 457 (375 to 554) | 29.15 (23.92 to 35.37) | 1134 (845 to 1509) | 37.07 (27.61 to 49.33) | 1.48 (0.73 to 2.46) | 0.73 (0.49 to 0.97) |
| Peru | 6820 (5549 to 8243) | 76.87 (62.54 to 92.92) | 10312 (7634 to 13115) | 69.39 (51.37 to 88.25) | 0.51 (0.11 to 1.04) | -0.27 (-0.45 to -0.08) |
| Philippines | 15373 (12524 to 17233) | 59.31 (48.32 to 66.49) | 25816 (21772 to 30138) | 54.64 (46.08 to 63.78) | 0.68 (0.4 to 1.02) | -0.16 (-0.28 to -0.04) |
| Poland | 6357 (6134 to 6582) | 44.01 (42.47 to 45.57) | 5201 (4801 to 5573) | 42.99 (39.68 to 46.06) | -0.18 (-0.25 to -0.11) | -0.39 (-0.61 to -0.16) |
| Portugal | 2492 (2223 to 2780) | 65.83 (58.72 to 73.41) | 1178 (1020 to 1375) | 39.9 (34.57 to 46.59) | -0.53 (-0.6 to -0.44) | -2.16 (-2.51 to -1.81) |
| Puerto Rico | 1950 (1794 to 2112) | 137.86 (126.79 to 149.33) | 1023 (861 to 1211) | 98.92 (83.21 to 117.09) | -0.48 (-0.57 to -0.36) | -1.53 (-1.87 to -1.18) |
| Qatar | 86 (67 to 114) | 36.29 (28.22 to 48.17) | 499 (358 to 662) | 30.22 (21.68 to 40.04) | 4.82 (2.88 to 7.25) | -0.48 (-0.91 to -0.05) |
| Republic of Korea | 10875 (9357 to 12751) | 51.67 (44.46 to 60.58) | 4220 (3291 to 4974) | 26.37 (20.57 to 31.08) | -0.61 (-0.71 to -0.52) | -2.66 (-2.89 to -2.43) |
| Republic of Moldova | 902 (846 to 979) | 51.78 (48.57 to 56.17) | 501 (443 to 567) | 40.43 (35.75 to 45.71) | -0.44 (-0.52 to -0.36) | -0.26 (-0.66 to 0.14) |
| Romania | 4241 (3925 to 4603) | 48.82 (45.18 to 52.99) | 2119 (1817 to 2425) | 39.32 (33.71 to 44.99) | -0.5 (-0.57 to -0.42) | -0.52 (-0.77 to -0.26) |
| Russian Federation | 30541 (29734 to 31407) | 52.5 (51.11 to 53.99) | 22092 (20640 to 23618) | 47.53 (44.41 to 50.82) | -0.28 (-0.33 to -0.22) | -0.8 (-1 to -0.6) |
| Rwanda | 3652 (2620 to 4827) | 133.27 (95.6 to 176.13) | 4988 (3413 to 7195) | 87.95 (60.17 to 126.87) | 0.37 (-0.18 to 1.16) | -2.18 (-2.54 to -1.82) |
| Saint Kitts and Nevis | 22 (20 to 24) | 126.13 (117.93 to 136.04) | 14 (10 to 19) | 59.98 (45.34 to 85.22) | -0.37 (-0.53 to -0.13) | -3.04 (-3.73 to -2.35) |
| Saint Lucia | 83 (78 to 87) | 146.82 (138.56 to 155.29) | 86 (72 to 103) | 129.83 (109.18 to 156.18) | 0.04 (-0.14 to 0.27) | -0.41 (-0.64 to -0.19) |
| Saint Vincent and the Grenadines | 83 (76 to 91) | 181.68 (166.28 to 197.37) | 68 (58 to 78) | 163.47 (140.91 to 189.48) | -0.19 (-0.31 to -0.05) | -0.53 (-0.68 to -0.38) |
| Samoa | 41 (29 to 71) | 61.01 (42.96 to 105.49) | 54 (36 to 91) | 66.72 (45.39 to 113.46) | 0.31 (-0.1 to 0.97) | 0.25 (0.14 to 0.37) |
| San Marino | 8 (7 to 10) | 88.83 (71.74 to 110.66) | 5 (3 to 7) | 56.2 (36.21 to 81.91) | -0.4 (-0.62 to -0.09) | -0.78 (-1.11 to -0.45) |
| Sao Tome and Principe | 10 (6 to 17) | 22.29 (13.32 to 38.94) | 37 (22 to 61) | 40.63 (24.38 to 67.23) | 2.86 (1.1 to 6.37) | 1.77 (1.23 to 2.31) |
| Saudi Arabia | 2968 (2107 to 4100) | 44.67 (31.7 to 61.7) | 13270 (9217 to 18770) | 71.65 (49.76 to 101.34) | 3.47 (1.67 to 6.2) | 1.83 (1.68 to 1.99) |
| Senegal | 829 (619 to 1073) | 30.06 (22.42 to 38.9) | 2554 (1768 to 3539) | 39.61 (27.43 to 54.89) | 2.08 (1.24 to 3.5) | 1.13 (0.94 to 1.32) |
| Serbia | 1618 (1363 to 1961) | 45.07 (37.95 to 54.62) | 758 (594 to 936) | 25.59 (20.05 to 31.58) | -0.53 (-0.64 to -0.38) | -1.73 (-1.88 to -1.57) |
| Seychelles | 24 (21 to 31) | 78.03 (65.85 to 100.42) | 30 (24 to 37) | 77.57 (61.41 to 97.06) | 0.22 (-0.09 to 0.59) | 0.35 (0.02 to 0.69) |
| Sierra Leone | 388 (263 to 542) | 24.29 (16.48 to 33.92) | 1437 (964 to 2048) | 38.54 (25.85 to 54.91) | 2.7 (1.51 to 4.85) | 1.78 (1.65 to 1.91) |
| Singapore | 648 (591 to 708) | 42.96 (39.16 to 46.93) | 562 (495 to 637) | 29.2 (25.74 to 33.12) | -0.13 (-0.26 to 0.01) | -1.91 (-2.21 to -1.61) |
| Slovakia | 966 (810 to 1346) | 47.21 (39.59 to 65.73) | 670 (532 to 816) | 39.16 (31.1 to 47.7) | -0.31 (-0.51 to -0.09) | -0.32 (-0.44 to -0.21) |
| Slovenia | 403 (362 to 447) | 52.54 (47.18 to 58.26) | 278 (232 to 333) | 48.81 (40.79 to 58.46) | -0.31 (-0.44 to -0.17) | -0.26 (-0.59 to 0.07) |
| Solomon Islands | 46 (23 to 77) | 35.91 (18.05 to 60.07) | 159 (105 to 225) | 57.99 (38.53 to 82.22) | 2.44 (1.18 to 4.78) | 1.67 (1.56 to 1.78) |
| Somalia | 2334 (1575 to 3361) | 80.5 (54.32 to 115.92) | 6826 (4491 to 9772) | 82.33 (54.17 to 117.87) | 1.92 (0.97 to 3.35) | 0.09 (0 to 0.18) |
| South Africa | 14503 (12647 to 17360) | 92.17 (80.37 to 110.32) | 24430 (18450 to 29958) | 100.76 (76.09 to 123.55) | 0.68 (0.25 to 1.03) | 0.24 (-0.5 to 0.99) |
| South Sudan | 1429 (974 to 2078) | 61.9 (42.21 to 90.02) | 2985 (1901 to 4321) | 82.93 (52.81 to 120.05) | 1.09 (0.41 to 2.17) | 0.83 (0.46 to 1.2) |
| Spain | 9529 (8823 to 10233) | 64.26 (59.5 to 69.01) | 3725 (3348 to 4105) | 30 (26.97 to 33.06) | -0.61 (-0.66 to -0.56) | -2.99 (-3.2 to -2.78) |
| Sri Lanka | 3952 (3159 to 5165) | 53.45 (42.72 to 69.85) | 3221 (2192 to 4490) | 39.93 (27.17 to 55.68) | -0.19 (-0.46 to 0.23) | -1.38 (-1.71 to -1.06) |
| Sudan | 3092 (1624 to 5852) | 40.57 (21.31 to 76.79) | 7980 (4851 to 12867) | 43.17 (26.24 to 69.6) | 1.58 (0.36 to 3.97) | 0.36 (0.22 to 0.5) |
| Suriname | 152 (106 to 182) | 93.24 (65.29 to 111.77) | 191 (147 to 241) | 88.84 (68.58 to 112.17) | 0.26 (-0.08 to 0.89) | -0.25 (-0.59 to 0.09) |
| Sweden | 1218 (1111 to 1322) | 41.48 (37.85 to 45.02) | 707 (619 to 799) | 21.81 (19.11 to 24.65) | -0.42 (-0.51 to -0.32) | -1.43 (-1.72 to -1.14) |
| Switzerland | 1433 (1292 to 1582) | 54.37 (49.04 to 60.05) | 728 (636 to 835) | 26.22 (22.89 to 30.08) | -0.49 (-0.57 to -0.41) | -2.91 (-3.12 to -2.7) |
| Syrian Arab Republic | 2311 (1536 to 3037) | 48.17 (32.01 to 63.3) | 1761 (1256 to 2349) | 34.63 (24.69 to 46.18) | -0.24 (-0.51 to 0.27) | -1.32 (-1.77 to -0.87) |
| Taiwan (Province of China) | 6194 (5801 to 6580) | 67.13 (62.88 to 71.31) | 3682 (3340 to 4035) | 48.81 (44.27 to 53.48) | -0.41 (-0.47 to -0.34) | -1.31 (-1.55 to -1.07) |
| Tajikistan | 1533 (1048 to 2158) | 72.47 (49.57 to 102.07) | 2609 (1828 to 3579) | 62.55 (43.84 to 85.79) | 0.7 (0.09 to 1.59) | -1.69 (-2.22 to -1.16) |
| Thailand | 12687 (10113 to 18775) | 48.92 (39 to 72.4) | 16044 (12380 to 23132) | 75.68 (58.4 to 109.11) | 0.26 (-0.04 to 0.71) | 0.02 (-0.64 to 0.67) |
| Timor-Leste | 100 (66 to 144) | 31.31 (20.88 to 45.24) | 195 (138 to 272) | 34.21 (24.17 to 47.64) | 0.96 (0.29 to 1.99) | 0.33 (-0.39 to 1.06) |
| Togo | 398 (303 to 514) | 29.06 (22.1 to 37.52) | 1478 (978 to 2054) | 43.94 (29.08 to 61.04) | 2.71 (1.43 to 4.65) | 1.44 (1.29 to 1.59) |
| Tokelau | 0 (0 to 0) | 42.11 (27.03 to 60.27) | 0 (0 to 1) | 84.22 (65.07 to 110.12) | 0.71 (0.13 to 1.59) | 1.17 (0.73 to 1.62) |
| Tonga | 28 (22 to 37) | 76.97 (59.75 to 99.25) | 38 (26 to 55) | 96.89 (67.02 to 141.39) | 0.33 (-0.14 to 1.14) | 0.7 (0.57 to 0.83) |
| Trinidad and Tobago | 488 (461 to 515) | 97.29 (92 to 102.8) | 529 (401 to 687) | 106.33 (80.51 to 138.02) | 0.09 (-0.19 to 0.4) | 0.24 (0.01 to 0.47) |
| Tunisia | 1688 (1297 to 2396) | 49.06 (37.71 to 69.66) | 2524 (1739 to 3713) | 58 (39.97 to 85.33) | 0.5 (0.01 to 1.15) | 0.39 (0.32 to 0.46) |
| T眉rkiye | 25520 (19032 to 32810) | 106.69 (79.57 to 137.17) | 18516 (14261 to 23104) | 58.12 (44.76 to 72.52) | -0.27 (-0.49 to 0.01) | -2.1 (-2.32 to -1.87) |
| Turkmenistan | 264 (229 to 335) | 17.19 (14.95 to 21.82) | 534 (411 to 680) | 25.68 (19.76 to 32.72) | 1.02 (0.44 to 1.76) | 1.12 (0.72 to 1.53) |
| Tuvalu | 2 (1 to 2) | 48.12 (33.27 to 67.42) | 3 (2 to 4) | 57.86 (41.99 to 78.62) | 0.66 (0.14 to 1.31) | 0.63 (0.6 to 0.66) |
| Uganda | 5079 (3567 to 6938) | 79.18 (55.61 to 108.16) | 25406 (16999 to 34648) | 147.72 (98.84 to 201.46) | 4 (2.05 to 7.23) | 1.38 (1.06 to 1.7) |
| Ukraine | 9062 (7813 to 11421) | 47.71 (41.13 to 60.13) | 9321 (6727 to 12087) | 67.62 (48.8 to 87.68) | 0.03 (-0.31 to 0.4) | 0.48 (0.22 to 0.74) |
| United Arab Emirates | 542 (373 to 797) | 56.72 (39 to 83.4) | 1817 (1337 to 2382) | 45.22 (33.28 to 59.3) | 2.35 (1 to 3.86) | -0.65 (-0.89 to -0.4) |
| United Kingdom | 11073 (10875 to 11300) | 52.98 (52.04 to 54.07) | 8095 (7783 to 8451) | 37.22 (35.78 to 38.85) | -0.27 (-0.29 to -0.25) | -1.59 (-1.83 to -1.34) |
| United Republic of Tanzania | 7666 (5484 to 10493) | 79.12 (56.6 to 108.3) | 19108 (12952 to 26327) | 81.89 (55.51 to 112.83) | 1.49 (0.64 to 2.63) | 0.01 (-0.04 to 0.06) |
| United States of America | 80870 (78968 to 83005) | 79.15 (77.29 to 81.24) | 33874 (32415 to 35380) | 30.44 (29.12 to 31.79) | -0.58 (-0.6 to -0.56) | -3.72 (-4.01 to -3.44) |
| United States Virgin Islands | 47 (37 to 58) | 117.41 (93.98 to 145.76) | 37 (27 to 50) | 158.12 (116.18 to 215.63) | -0.21 (-0.45 to 0.12) | 1.53 (1.3 to 1.77) |
| Uruguay | 990 (898 to 1082) | 87.19 (79.09 to 95.24) | 1073 (954 to 1212) | 89.67 (79.72 to 101.33) | 0.08 (-0.08 to 0.26) | -0.1 (-0.25 to 0.04) |
| Uzbekistan | 4038 (3364 to 4814) | 47.04 (39.2 to 56.08) | 5804 (4714 to 7159) | 42.25 (34.32 to 52.11) | 0.44 (0.06 to 0.94) | -0.77 (-1.06 to -0.47) |
| Vanuatu | 21 (13 to 32) | 35.94 (22.99 to 55.17) | 68 (48 to 91) | 54.23 (38.27 to 72.85) | 2.21 (1 to 4.13) | 1.2 (1.11 to 1.29) |
| Venezuela (Bolivarian Republic of) | 5262 (5035 to 5515) | 65.7 (62.87 to 68.86) | 7185 (5298 to 9318) | 76.74 (56.59 to 99.53) | 0.37 (-0.02 to 0.78) | 0.65 (0.33 to 0.96) |
| Viet Nam | 11771 (8643 to 16399) | 41.28 (30.31 to 57.5) | 18196 (12990 to 25815) | 47.4 (33.84 to 67.24) | 0.55 (0.05 to 1.31) | 0.48 (0.3 to 0.66) |
| Yemen | 1055 (546 to 1906) | 22.95 (11.89 to 41.47) | 3445 (2149 to 5477) | 25.04 (15.62 to 39.8) | 2.27 (1.12 to 4.35) | 0.42 (0.19 to 0.66) |
| Zambia | 2767 (2056 to 3574) | 91.18 (67.76 to 117.8) | 10020 (5159 to 20401) | 123.81 (63.75 to 252.08) | 2.62 (0.84 to 6.39) | 0.8 (0.63 to 0.96) |
| Zimbabwe | 2593 (1961 to 3310) | 65.41 (49.46 to 83.5) | 11628 (7708 to 15868) | 183.47 (121.62 to 250.38) | 3.48 (1.88 to 5.58) | 4.32 (3.34 to 5.31) |
