# Supplementary material for: Global disease burden of non-Hodgkin lymphoma in adolescents and young adults aged 15 to 39 from 1990 to 2021
Source: Research Square preprint supplement (doi:10.21203/rs.3.rs-5831900/v1), 2025-01-17
Supplement: Supplementary file 2 [file f854131d7a41fe198fb1d188.docx]

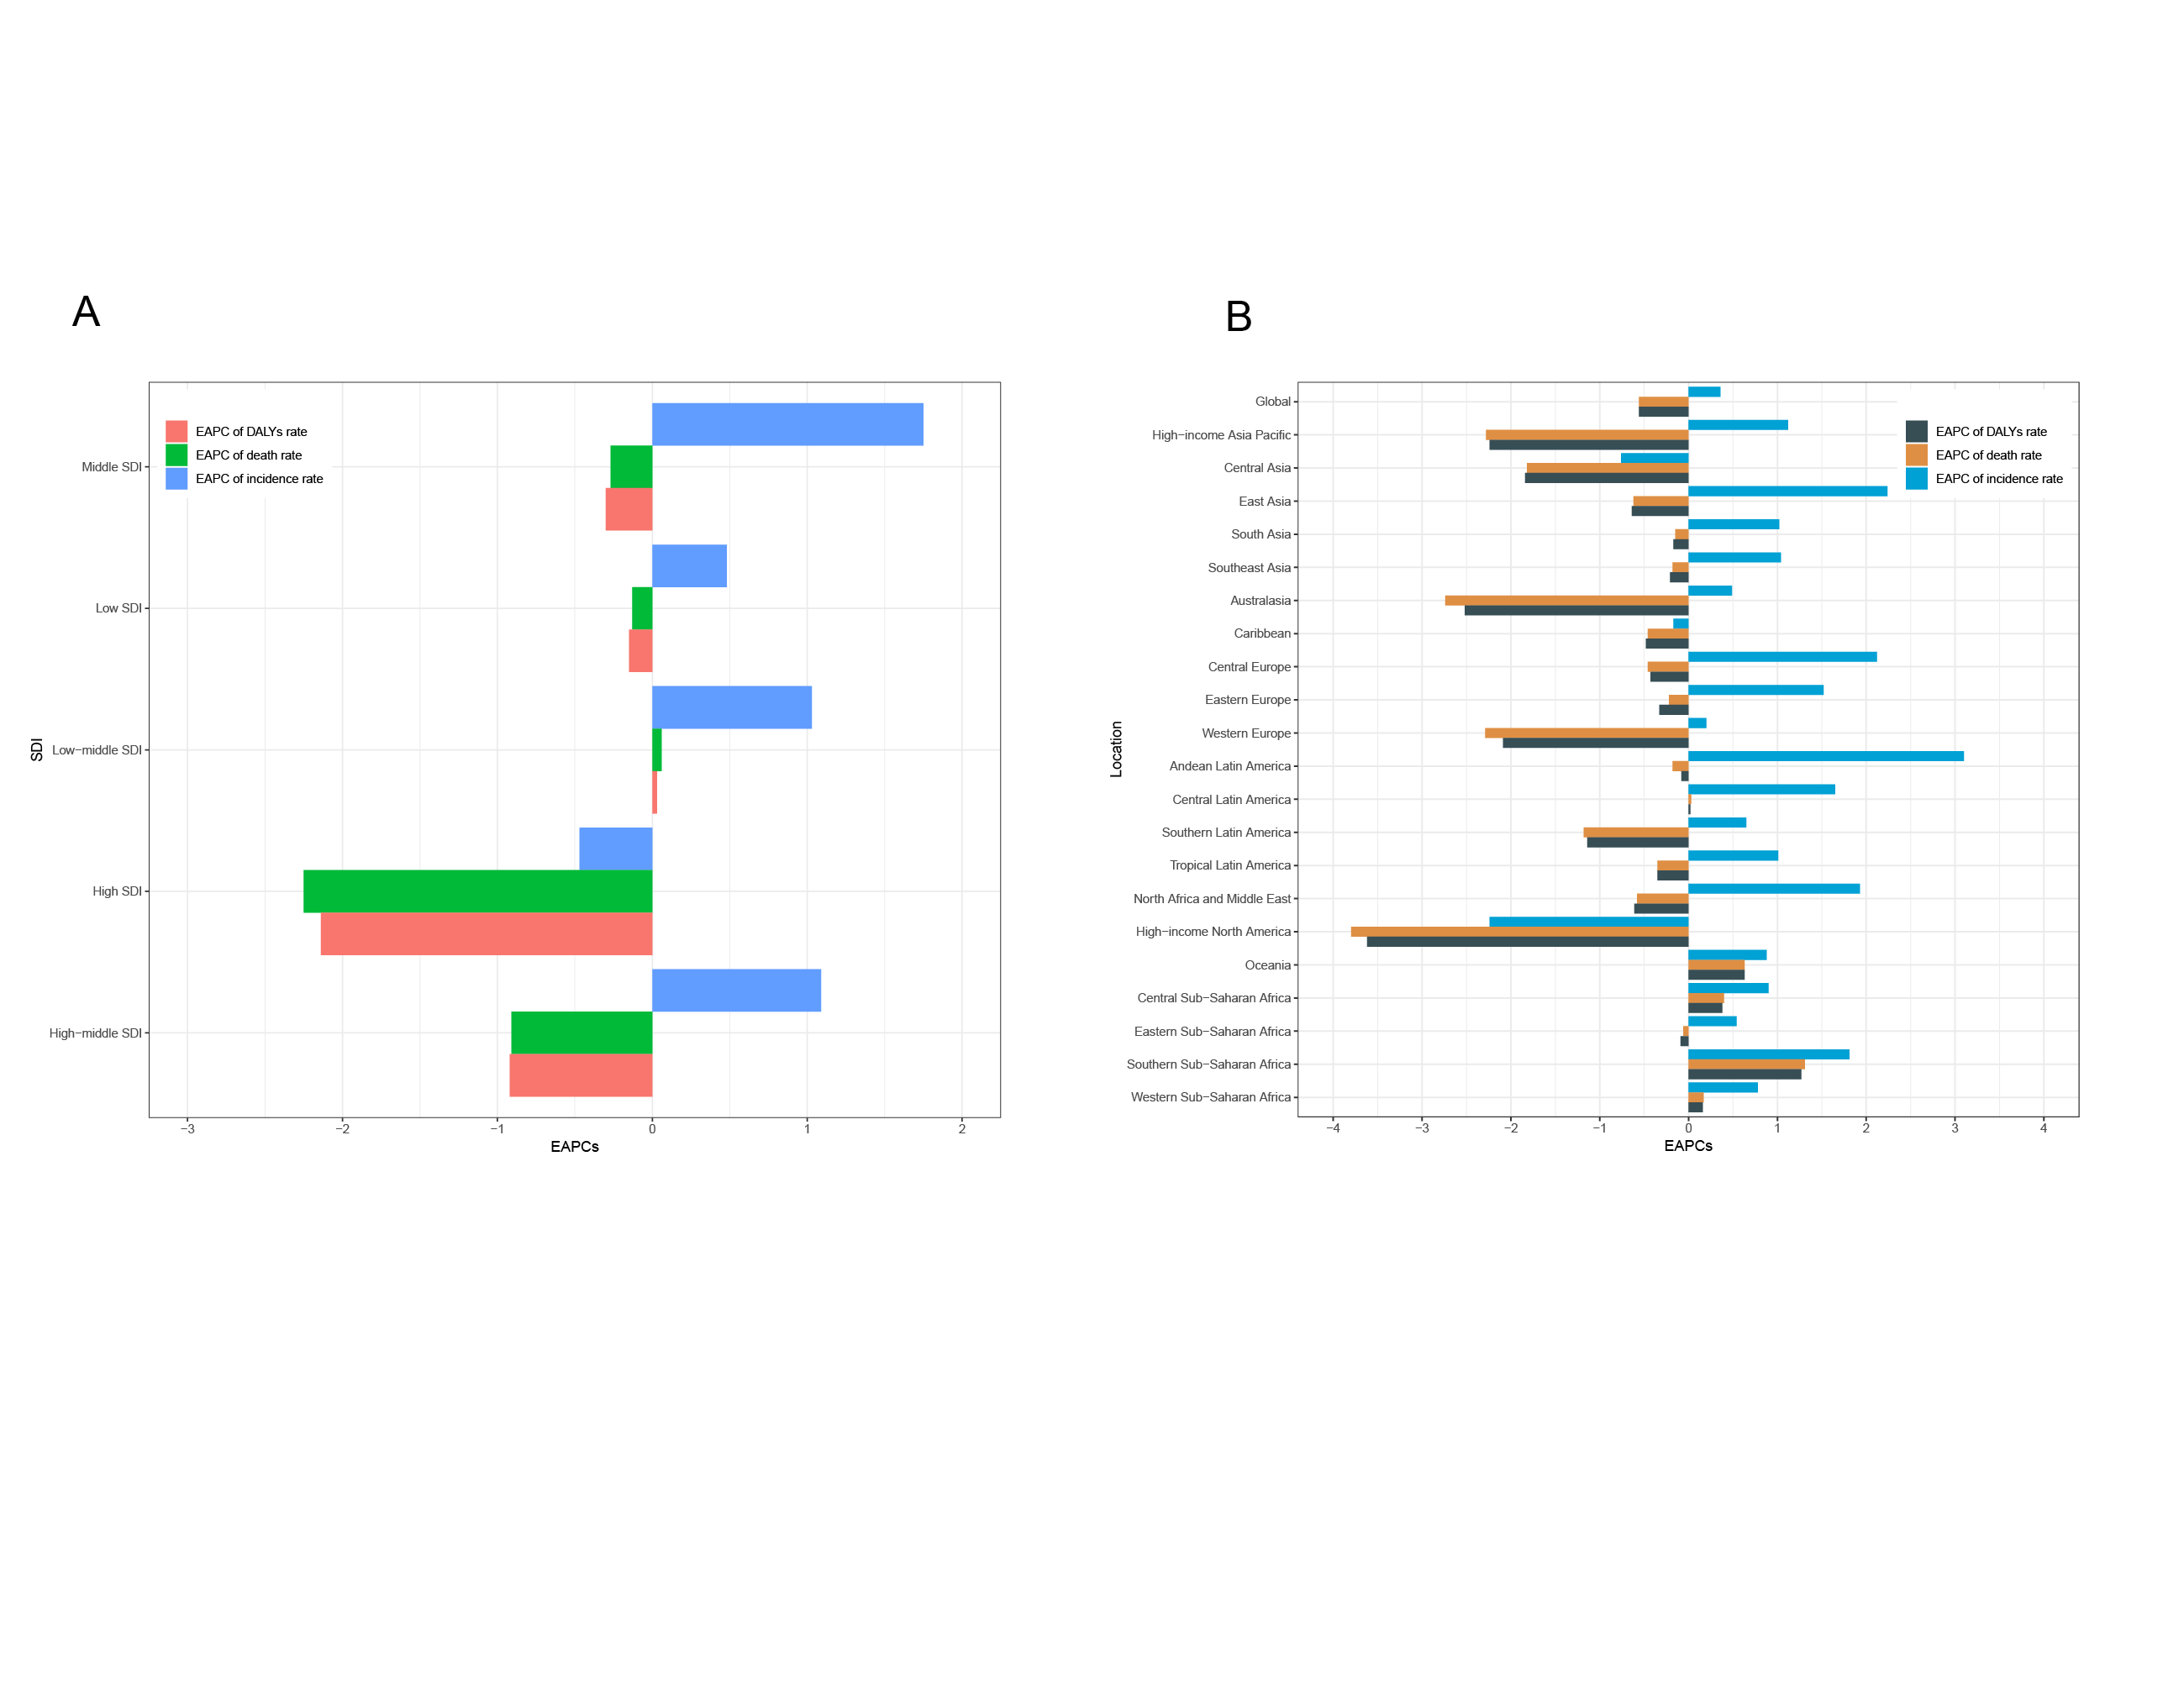


**Supplementary Figure 1.** EAPC of incidence, mortality, and DALYs rates in five SDI regions and 21 geographical regions. (A). EAPC of incidence, mortality, and DALYs rates in five SDI regions. (B). EAPC of incidence, mortality, and DALYs rates in 21 geographical regions.
